# Supplementary material for: Role of Royal Jelly Treated Adipose‐Derived Stem Cell‐Extracellular Vesicles on Fibroblast Proliferation, Migration, and Collagen Production
Source: Hindawi journal article supplement (doi:10.1155/2023/7950026), 2023-01-01
Supplement: f1 [file 7950026.f1.zip]

Supplementary Table 2. Gene Ontology (GO) enrichment analysis based on 3 functional groups (biological processes (BP), cellular components (CC), and molecular functions (MF) in EVs isolated from RJ-treated ADSCs.

Molecular functions (MF): Upregulated

| Category      | Term                                                                                                                                                                                                         | Count | %           | P-Value     | FDR         |
|---------------|--------------------------------------------------------------------------------------------------------------------------------------------------------------------------------------------------------------|-------|-------------|-------------|-------------|
| GOTERM_MF_ALL | GO:0005201~extracellular matrix structural constituent                                                                                                                                                       | 21    | 2.928870293 | 3.00E-11    | 3.45E-08    |
| GOTERM_MF_ALL | GO:0019838~growth factor binding                                                                                                                                                                             | 23    | 3.207810321 | 4.09E-09    | 1.76E-06    |
| GOTERM_MF_ALL | GO:0005515~protein binding                                                                                                                                                                                   | 489   | 68.20083682 | 4.58E-09    | 1.76E-06    |
| GOTERM_MF_ALL | GO:0043394~proteoglycan binding                                                                                                                                                                              | 10    | 1.394700139 | 1.79E-06    | 5.15E-04    |
| GOTERM_MF_ALL | GO:0005178~integrin binding                                                                                                                                                                                  | 17    | 2.370990237 | 3.21E-06    | 7.38E-04    |
| GOTERM_MF_ALL | GO:0005488~binding                                                                                                                                                                                           | 598   | 83.40306834 | 3.86E-06    | 7.40E-04    |
| GOTERM_MF_ALL | GO:0005539~glycosaminoglycan binding                                                                                                                                                                         | 24    | 3.347280335 | 6.49E-06    | 0.001066585 |
| GOTERM_MF_ALL | GO:0050431~transforming growth factor beta binding                                                                                                                                                           | 7     | 0.976290098 | 1.93E-05    | 0.002777237 |
| GOTERM_MF_ALL | GO:0048407~platelet-derived growth factor binding                                                                                                                                                            | 6     | 0.836820084 | 3.32E-05    | 0.004243064 |
| GOTERM_MF_ALL | GO:0008201~heparin binding                                                                                                                                                                                   | 19    | 2.649930265 | 5.12E-05    | 0.005893017 |
| GOTERM_MF_ALL | GO:0005509~calcium ion binding                                                                                                                                                                               | 50    | 6.973500697 | 9.11E-05    | 0.00952967  |
| GOTERM_MF_ALL | GO:0050839~cell adhesion molecule binding                                                                                                                                                                    | 36    | 5.020920502 | 1.29E-04    | 0.012384863 |
| GOTERM_MF_ALL | GO:0044877~macromolecular complex binding                                                                                                                                                                    | 78    | 10.87866109 | 1.46E-04    | 0.012902646 |
| GOTERM_MF_ALL | GO:0005518~collagen binding                                                                                                                                                                                  | 11    | 1.534170153 | 1.67E-04    | 0.013704086 |
| GOTERM_MF_ALL | GO:0046872~metal ion binding                                                                                                                                                                                 | 202   | 28.17294282 | 2.40E-04    | 0.018423467 |
| GOTERM_MF_ALL | GO:1901681~sulfur compound binding                                                                                                                                                                           | 22    | 3.068340307 | 3.10E-04    | 0.0222978   |
| GOTERM_MF_ALL | GO:0016706~oxidoreductase activity, acting on paired donors, with incorporation or reduction of molecular oxygen, 2-oxoglutarate as one donor, and incorporation of one atom each of oxygen into both donors | 9     | 1.255230126 | 3.52E-04    | 0.023803772 |
| GOTERM_MF_ALL | GO:0001968~fibronectin binding                                                                                                                                                                               | 7     | 0.976290098 | 3.98E-04    | 0.025453795 |
| GOTERM_MF_ALL | GO:0043169~cation binding                                                                                                                                                                                    | 202   | 28.17294282 | 4.52E-04    | 0.027400399 |
| GOTERM_MF_ALL | GO:0019798~procollagen-proline dioxygenase activity                                                                                                                                                          | 5     | 0.69735007  | 5.99E-04    | 0.03449016  |
| GOTERM_MF_ALL | GO:0001948~glycoprotein binding                                                                                                                                                                              | 13    | 1.813110181 | 6.48E-04    | 0.035489562 |
| GOTERM_MF_ALL | GO:0051213~dioxygenase activity                                                                                                                                                                              | 12    | 1.673640167 | 7.88E-04    | 0.041245965 |
| GOTERM_MF_ALL | GO:0031418~L-ascorbic acid binding                                                                                                                                                                           | 6     | 0.836820084 | 0.001057444 | 0.05291819  |
| GOTERM_MF_ALL | GO:0019955~cytokine binding                                                                                                                                                                                  | 12    | 1.673640167 | 0.001131235 | 0.054252141 |
| GOTERM_MF_ALL | GO:0032403~protein complex binding                                                                                                                                                                           | 48    | 6.694560669 | 0.001328557 | 0.061166771 |
| GOTERM_MF_ALL | GO:0043167~ion binding                                                                                                                                                                                       | 205   | 28.59135286 | 0.001568116 | 0.069419285 |
| GOTERM_MF_ALL | GO:0046527~glucosyltransferase activity                                                                                                                                                                      | 5     | 0.69735007  | 0.00283047  | 0.116352529 |
| GOTERM_MF_ALL | GO:0031543~peptidyl-proline dioxygenase activity                                                                                                                                                             | 5     | 0.69735007  | 0.00283047  | 0.116352529 |
| GOTERM_MF_ALL | GO:0015171~amino acid transmembrane transporter activity                                                                                                                                                     | 10    | 1.394700139 | 0.003480864 | 0.134705433 |
| GOTERM_MF_ALL | GO:0030246~carbohydrate binding                                                                                                                                                                              | 21    | 2.928870293 | 0.003511002 | 0.134705433 |
| GOTERM_MF_ALL | GO:0005520~insulin-like growth factor binding                                                                                                                                                                | 6     | 0.836820084 | 0.004080263 | 0.151460252 |
| GOTERM_MF_ALL | GO:0050840~extracellular matrix binding                                                                                                                                                                      | 8     | 1.115760112 | 0.004225086 | 0.151460252 |
| GOTERM_MF_ALL | GO:0043395~heparan sulfate proteoglycan binding                                                                                                                                                              | 5     | 0.69735007  | 0.004474065 | 0.151460252 |
| GOTERM_MF_ALL | GO:0070008~serine-type exopeptidase activity                                                                                                                                                                 | 5     | 0.69735007  | 0.004474065 | 0.151460252 |
| GOTERM_MF_ALL | GO:0016705~oxidoreductase activity, acting on paired donors, with incorporation or reduction of molecular oxygen                                                                                             | 15    | 2.092050209 | 0.005386834 | 0.177149884 |
| GOTERM_MF_ALL | GO:0004656~procollagen-proline 4-dioxygenase activity                                                                                                                                                        | 3     | 0.418410042 | 0.008586815 | 0.274429324 |
| GOTERM_MF_ALL | GO:0019899~enzyme binding                                                                                                                                                                                    | 90    | 12.55230126 | 0.008821794 | 0.274429324 |
| GOTERM_MF_ALL | GO:0004540~ribonuclease activity                                                                                                                                                                             | 11    | 1.534170153 | 0.01053164  | 0.318328217 |
| GOTERM_MF_ALL | GO:0016891~endoribonuclease activity, producing 5'-phosphomonoesters                                                                                                                                         | 6     | 0.836820084 | 0.010786099 | 0.318328217 |
| GOTERM_MF_ALL | GO:0071813~lipoprotein particle binding                                                                                                                                                                      | 5     | 0.69735007  | 0.012924162 | 0.3628222   |
| GOTERM_MF_ALL | GO:0071814~protein-lipid complex binding                                                                                                                                                                     | 5     | 0.69735007  | 0.012924162 | 0.3628222   |
| GOTERM_MF_ALL | GO:0030023~extracellular matrix constituent conferring elasticity                                                                                                                                            | 3     | 0.418410042 | 0.013944108 | 0.364765194 |
| GOTERM_MF_ALL | GO:0032296~double-stranded RNA-specific ribonuclease activity                                                                                                                                                | 3     | 0.418410042 | 0.013944108 | 0.364765194 |
| GOTERM_MF_ALL | GO:0004525~ribonuclease III activity                                                                                                                                                                         | 3     | 0.418410042 | 0.013944108 | 0.364765194 |
| GOTERM_MF_ALL | GO:0004185~serine-type carboxypeptidase activity                                                                                                                                                             | 4     | 0.557880056 | 0.015433048 | 0.394646512 |
| GOTERM_MF_ALL | GO:0046943~carboxylic acid transmembrane transporter activity                                                                                                                                                | 11    | 1.534170153 | 0.015772146 | 0.394646512 |
| GOTERM_MF_ALL | GO:0046914~transition metal ion binding                                                                                                                                                                      | 72    | 10.041841   | 0.01695434  | 0.415200967 |
| GOTERM_MF_ALL | GO:0005342~organic acid transmembrane transporter activity                                                                                                                                                   | 11    | 1.534170153 | 0.01853036  | 0.4314852   |
| GOTERM_MF_ALL | GO:0001618~virus receptor activity                                                                                                                                                                           | 8     | 1.115760112 | 0.018718596 | 0.4314852   |
| GOTERM_MF_ALL | GO:0030169~low-density lipoprotein particle binding                                                                                                                                                          | 4     | 0.557880056 | 0.018743927 | 0.4314852   |

|               |                                                                                                                         |     |             |             |             |
|---------------|-------------------------------------------------------------------------------------------------------------------------|-----|-------------|-------------|-------------|
| GOTERM_MF_ALL | GO:0030228~lipoprotein particle receptor activity                                                                       | 4   | 0.557880056 | 0.022416263 | 0.505904295 |
| GOTERM_MF_ALL | GO:0016893~endonuclease activity, active with either ribo- or deoxyribonucleic acids and producing 5'-phosphomonoesters | 6   | 0.836820084 | 0.027168231 | 0.601358346 |
| GOTERM_MF_ALL | GO:0097493~structural molecule activity conferring elasticity                                                           | 3   | 0.418410042 | 0.027806361 | 0.603870213 |
| GOTERM_MF_ALL | GO:0097367~carbohydrate derivative binding                                                                              | 105 | 14.64435146 | 0.029135019 | 0.611074053 |
| GOTERM_MF_ALL | GO:0008233~peptidase activity                                                                                           | 40  | 5.578800558 | 0.02919989  | 0.611074053 |
| GOTERM_MF_ALL | GO:0005506~iron ion binding                                                                                             | 13  | 1.813110181 | 0.032436005 | 0.666675737 |
| GOTERM_MF_ALL | GO:0031545~peptidyl-proline 4-dioxygenase activity                                                                      | 3   | 0.418410042 | 0.036133292 | 0.717058944 |
| GOTERM_MF_ALL | GO:0008035~high-density lipoprotein particle binding                                                                    | 3   | 0.418410042 | 0.036133292 | 0.717058944 |
| GOTERM_MF_ALL | GO:0002020~protease binding                                                                                             | 10  | 1.394700139 | 0.038652618 | 0.754053613 |
| GOTERM_MF_ALL | GO:0019199~transmembrane receptor protein kinase activity                                                               | 8   | 1.115760112 | 0.040085763 | 0.768978555 |
| GOTERM_MF_ALL | GO:0032947~protein complex scaffold                                                                                     | 7   | 0.976290098 | 0.045473504 | 0.858032844 |
| GOTERM_MF_ALL | GO:0030165~PDZ domain binding                                                                                           | 8   | 1.115760112 | 0.049748983 | 0.923565805 |
| GOTERM_MF_ALL | GO:0003756~protein disulfide isomerase activity                                                                         | 4   | 0.557880056 | 0.05195553  | 0.934387743 |
| GOTERM_MF_ALL | GO:0016864~intramolecular oxidoreductase activity, transposing S-S bonds                                                | 4   | 0.557880056 | 0.05195553  | 0.934387743 |
| GOTERM_MF_ALL | GO:0001786~phosphatidylserine binding                                                                                   | 5   | 0.69735007  | 0.054223898 | 0.960180101 |
| GOTERM_MF_ALL | GO:0008140~cAMP response element binding protein binding                                                                | 3   | 0.418410042 | 0.055173102 | 0.962185454 |
| GOTERM_MF_ALL | GO:0003682~chromatin binding                                                                                            | 28  | 3.905160391 | 0.057925445 | 0.982081911 |
| GOTERM_MF_ALL | GO:0016758~transferase activity, transferring hexosyl groups                                                            | 14  | 1.952580195 | 0.060932707 | 0.982081911 |
| GOTERM_MF_ALL | GO:0005035~death receptor activity                                                                                      | 4   | 0.557880056 | 0.064534487 | 0.982081911 |
| GOTERM_MF_ALL | GO:0005031~tumor necrosis factor-activated receptor activity                                                            | 4   | 0.557880056 | 0.064534487 | 0.982081911 |
| GOTERM_MF_ALL | GO:0005198~structural molecule activity                                                                                 | 40  | 5.578800558 | 0.065014126 | 0.982081911 |
| GOTERM_MF_ALL | GO:0008238~exopeptidase activity                                                                                        | 9   | 1.255230126 | 0.067452106 | 0.982081911 |
| GOTERM_MF_ALL | GO:0008237~metallopeptidase activity                                                                                    | 13  | 1.813110181 | 0.067539302 | 0.982081911 |
| GOTERM_MF_ALL | GO:0005102~receptor binding                                                                                             | 69  | 9.623430962 | 0.0675451   | 0.982081911 |
| GOTERM_MF_ALL | GO:0004222~metalloendopeptidase activity                                                                                | 9   | 1.255230126 | 0.073224736 | 0.982081911 |
| GOTERM_MF_ALL | GO:0003980~UDP-glucose:glycoprotein glucosyltransferase activity                                                        | 2   | 0.278940028 | 0.076212607 | 0.982081911 |
| GOTERM_MF_ALL | GO:0004923~leukemia inhibitory factor receptor activity                                                                 | 2   | 0.278940028 | 0.076212607 | 0.982081911 |
| GOTERM_MF_ALL | GO:0048185~activin binding                                                                                              | 3   | 0.418410042 | 0.076909551 | 0.982081911 |
| GOTERM_MF_ALL | GO:0016538~cyclin-dependent protein serine/threonine kinase regulator activity                                          | 4   | 0.557880056 | 0.085729101 | 0.982081911 |
| GOTERM_MF_ALL | GO:0070011~peptidase activity, acting on L-amino acid peptides                                                          | 36  | 5.020920502 | 0.085966332 | 0.982081911 |
| GOTERM_MF_ALL | GO:0016787~hydrolase activity                                                                                           | 115 | 16.0390516  | 0.087352355 | 0.982081911 |
| GOTERM_MF_ALL | GO:0004521~endoribonuclease activity                                                                                    | 6   | 0.836820084 | 0.08783706  | 0.982081911 |
| GOTERM_MF_ALL | GO:0005165~neurotrophin receptor binding                                                                                | 3   | 0.418410042 | 0.088623859 | 0.982081911 |
| GOTERM_MF_ALL | GO:0005041~low-density lipoprotein receptor activity                                                                    | 3   | 0.418410042 | 0.088623859 | 0.982081911 |
| GOTERM_MF_ALL | GO:0019842~vitamin binding                                                                                              | 7   | 0.976290098 | 0.094950453 | 0.982081911 |
