# Supplementary material for: Role of Royal Jelly Treated Adipose‐Derived Stem Cell‐Extracellular Vesicles on Fibroblast Proliferation, Migration, and Collagen Production
Source: Hindawi journal article supplement (doi:10.1155/2023/7950026), 2023-01-01
Supplement: f1 [file 7950026.f1.zip]

Supplementary Table 2. Gene Ontology (GO) enrichment analysis based on 3 functional groups (biological processes (BP), cellular components (CC), and molecular functions (MF) in EVs isolated from RJ-treated ADSCs.

Cellular components (CC): Upregulated

| Category      | Term                                                            | Count | %           | P-Value     | FDR         |
|---------------|-----------------------------------------------------------------|-------|-------------|-------------|-------------|
| GOTERM_CC_ALL | GO:0031012~extracellular matrix                                 | 49    | 6.834030683 | 8.52E-18    | 3.79E-15    |
| GOTERM_CC_ALL | GO:0005788~endoplasmic reticulum lumen                          | 31    | 4.323570432 | 3.97E-11    | 5.94E-09    |
| GOTERM_CC_ALL | GO:0005578~proteinaceous extracellular matrix                   | 37    | 5.160390516 | 4.00E-11    | 5.94E-09    |
| GOTERM_CC_ALL | GO:0070062~extracellular exosome                                | 159   | 22.17573222 | 9.48E-08    | 9.52E-06    |
| GOTERM_CC_ALL | GO:0043231~intracellular membrane-bounded organelle             | 49    | 6.834030683 | 1.07E-07    | 9.52E-06    |
| GOTERM_CC_ALL | GO:0016020~membrane                                             | 129   | 17.9916318  | 3.46E-07    | 2.57E-05    |
| GOTERM_CC_ALL | GO:0009986~cell surface                                         | 44    | 6.136680614 | 4.15E-06    | 2.64E-04    |
| GOTERM_CC_ALL | GO:0005604~basement membrane                                    | 14    | 1.952580195 | 7.74E-06    | 4.31E-04    |
| GOTERM_CC_ALL | GO:0005783~endoplasmic reticulum                                | 58    | 8.089260809 | 9.49E-06    | 4.69E-04    |
| GOTERM_CC_ALL | GO:0005576~extracellular region                                 | 95    | 13.24965132 | 1.43E-05    | 6.36E-04    |
| GOTERM_CC_ALL | GO:0043202~lysosomal lumen                                      | 14    | 1.952580195 | 1.76E-05    | 7.12E-04    |
| GOTERM_CC_ALL | GO:0005789~endoplasmic reticulum membrane                       | 58    | 8.089260809 | 3.06E-05    | 0.00113423  |
| GOTERM_CC_ALL | GO:0005794~Golgi apparatus                                      | 56    | 7.810320781 | 1.14E-04    | 0.003892014 |
| GOTERM_CC_ALL | GO:0005581~collagen trimer                                      | 13    | 1.813110181 | 1.79E-04    | 0.005681983 |
| GOTERM_CC_ALL | GO:0001527~microfibril                                          | 5     | 0.69735007  | 3.56E-04    | 0.01057379  |
| GOTERM_CC_ALL | GO:0005615~extracellular space                                  | 76    | 10.59972106 | 4.70E-04    | 0.013069175 |
| GOTERM_CC_ALL | GO:0005764~lysosome                                             | 20    | 2.789400279 | 0.001011939 | 0.026488999 |
| GOTERM_CC_ALL | GO:0044322~endoplasmic reticulum quality control compartment    | 5     | 0.69735007  | 0.001108059 | 0.027393686 |
| GOTERM_CC_ALL | GO:0016607~nuclear speck                                        | 18    | 2.510460251 | 0.001706476 | 0.039967455 |
| GOTERM_CC_ALL | GO:0005577~fibrinogen complex                                   | 4     | 0.557880056 | 0.003825532 | 0.084989294 |
| GOTERM_CC_ALL | GO:0005765~lysosomal membrane                                   | 21    | 2.928870293 | 0.004010731 | 0.084989294 |
| GOTERM_CC_ALL | GO:0071953~elastic fiber                                        | 3     | 0.418410042 | 0.008162977 | 0.165114759 |
| GOTERM_CC_ALL | GO:0000786~nucleosome                                           | 10    | 1.394700139 | 0.009221211 | 0.178410392 |
| GOTERM_CC_ALL | GO:0005911~cell-cell junction                                   | 14    | 1.952580195 | 0.013966119 | 0.253268809 |
| GOTERM_CC_ALL | GO:0005925~focal adhesion                                       | 25    | 3.486750349 | 0.014228585 | 0.253268809 |
| GOTERM_CC_ALL | GO:0009897~external side of plasma membrane                     | 16    | 2.231520223 | 0.015832866 | 0.270454964 |
| GOTERM_CC_ALL | GO:0016021~integral component of membrane                       | 222   | 30.9623431  | 0.016409627 | 0.270454964 |
| GOTERM_CC_ALL | GO:0005605~basal lamina                                         | 4     | 0.557880056 | 0.01749569  | 0.278056502 |
| GOTERM_CC_ALL | GO:0010008~endosome membrane                                    | 14    | 1.952580195 | 0.02399065  | 0.36813238  |
| GOTERM_CC_ALL | GO:0005681~spliceosomal complex                                 | 9     | 1.255230126 | 0.026070557 | 0.386713269 |
| GOTERM_CC_ALL | GO:0005796~Golgi lumen                                          | 9     | 1.255230126 | 0.029110776 | 0.417880489 |
| GOTERM_CC_ALL | GO:0005901~caveola                                              | 7     | 0.976290098 | 0.03606702  | 0.501557001 |
| GOTERM_CC_ALL | GO:0005791~rough endoplasmic reticulum                          | 6     | 0.836820084 | 0.043056693 | 0.555576664 |
| GOTERM_CC_ALL | GO:0033179~proton-transporting V-type ATPase, V0 domain         | 3     | 0.418410042 | 0.043187999 | 0.555576664 |
| GOTERM_CC_ALL | GO:0030176~integral component of endoplasmic reticulum membrane | 9     | 1.255230126 | 0.043697041 | 0.555576664 |
| GOTERM_CC_ALL | GO:0072546~ER membrane protein complex                          | 3     | 0.418410042 | 0.052656925 | 0.650898102 |
| GOTERM_CC_ALL | GO:0031093~platelet alpha granule lumen                         | 6     | 0.836820084 | 0.056496713 | 0.661606246 |
| GOTERM_CC_ALL | GO:0031594~neuromuscular junction                               | 6     | 0.836820084 | 0.056496713 | 0.661606246 |
| GOTERM_CC_ALL | GO:0005640~nuclear outer membrane                               | 4     | 0.557880056 | 0.060623089 | 0.691724993 |
| GOTERM_CC_ALL | GO:0043234~protein complex                                      | 23    | 3.207810321 | 0.067362354 | 0.74940619  |
| GOTERM_CC_ALL | GO:0005584~collagen type I trimer                               | 2     | 0.278940028 | 0.074292775 | 0.787149645 |
| GOTERM_CC_ALL | GO:0034686~integrin alphav-beta8 complex                        | 2     | 0.278940028 | 0.074292775 | 0.787149645 |
| GOTERM_CC_ALL | GO:0005654~nucleoplasm                                          | 120   | 16.73640167 | 0.080652999 | 0.81616829  |
| GOTERM_CC_ALL | GO:0008305~integrin complex                                     | 4     | 0.557880056 | 0.080699786 | 0.81616829  |
| GOTERM_CC_ALL | GO:0000177~cytoplasmic exosome (RNase complex)                  | 3     | 0.418410042 | 0.084743695 | 0.838020982 |
| GOTERM_CC_ALL | GO:0042470~melanosome                                           | 8     | 1.115760112 | 0.088587609 | 0.846956736 |
| GOTERM_CC_ALL | GO:0005770~late endosome                                        | 9     | 1.255230126 | 0.091977016 | 0.846956736 |
| GOTERM_CC_ALL | GO:0045121~membrane raft                                        | 13    | 1.813110181 | 0.092668193 | 0.846956736 |
| GOTERM_CC_ALL | GO:0031091~platelet alpha granule                               | 3     | 0.418410042 | 0.096468506 | 0.846956736 |
