# Supplementary material for: Role of Royal Jelly Treated Adipose‐Derived Stem Cell‐Extracellular Vesicles on Fibroblast Proliferation, Migration, and Collagen Production
Source: Hindawi journal article supplement (doi:10.1155/2023/7950026), 2023-01-01
Supplement: f1 [file 7950026.f1.zip]

Supplementary Table 2. Gene Ontology (GO) enrichment analysis based on 3 functional groups (biological processes (BP), cellular components (CC), and molecular functions (MF) in EVs isolated from RJ-treated ADSCs.

Biological processes (BP): Upregulated

| Category      | Term                                                                | Count | %           | P-Value  | FDR         |
|---------------|---------------------------------------------------------------------|-------|-------------|----------|-------------|
| GOTERM_BP_ALL | GO:0030198~extracellular matrix organization                        | 51    | 7.112970711 | 3.27E-16 | 1.06E-12    |
| GOTERM_BP_ALL | GO:0043062~extracellular structure organization                     | 51    | 7.112970711 | 3.56E-16 | 1.06E-12    |
| GOTERM_BP_ALL | GO:0030199~collagen fibril organization                             | 14    | 1.952580195 | 2.15E-09 | 4.24E-06    |
| GOTERM_BP_ALL | GO:0072359~circulatory system development                           | 76    | 10.59972106 | 4.24E-09 | 5.03E-06    |
| GOTERM_BP_ALL | GO:0072358~cardiovascular system development                        | 76    | 10.59972106 | 4.24E-09 | 5.03E-06    |
| GOTERM_BP_ALL | GO:0071840~cellular component organization or biogenesis            | 318   | 44.35146444 | 6.34E-09 | 6.26E-06    |
| GOTERM_BP_ALL | GO:0001944~vasculature development                                  | 56    | 7.810320781 | 7.95E-09 | 6.73E-06    |
| GOTERM_BP_ALL | GO:0001568~blood vessel development                                 | 53    | 7.391910739 | 2.00E-08 | 1.34E-05    |
| GOTERM_BP_ALL | GO:0044259~multicellular organismal macromolecule metabolic process | 21    | 2.928870293 | 2.04E-08 | 1.34E-05    |
| GOTERM_BP_ALL | GO:0032963~collagen metabolic process                               | 20    | 2.789400279 | 5.15E-08 | 2.59E-05    |
| GOTERM_BP_ALL | GO:0016043~cellular component organization                          | 307   | 42.81729428 | 5.16E-08 | 2.59E-05    |
| GOTERM_BP_ALL | GO:0044236~multicellular organism metabolic process                 | 22    | 3.068340307 | 5.23E-08 | 2.59E-05    |
| GOTERM_BP_ALL | GO:0043170~macromolecule metabolic process                          | 426   | 59.41422594 | 6.46E-08 | 2.94E-05    |
| GOTERM_BP_ALL | GO:0022610~biological adhesion                                      | 111   | 15.48117155 | 9.72E-08 | 4.12E-05    |
| GOTERM_BP_ALL | GO:0007155~cell adhesion                                            | 110   | 15.34170153 | 1.51E-07 | 5.98E-05    |
| GOTERM_BP_ALL | GO:0030574~collagen catabolic process                               | 14    | 1.952580195 | 1.18E-06 | 4.39E-04    |
| GOTERM_BP_ALL | GO:0031589~cell-substrate adhesion                                  | 32    | 4.463040446 | 1.43E-06 | 4.99E-04    |
| GOTERM_BP_ALL | GO:0030334~regulation of cell migration                             | 54    | 7.531380753 | 2.00E-06 | 6.59E-04    |
| GOTERM_BP_ALL | GO:0034976~response to endoplasmic reticulum stress                 | 29    | 4.044630404 | 2.74E-06 | 8.56E-04    |
| GOTERM_BP_ALL | GO:0009653~anatomical structure morphogenesis                       | 148   | 20.64156206 | 3.36E-06 | 9.95E-04    |
| GOTERM_BP_ALL | GO:0044243~multicellular organism catabolic process                 | 14    | 1.952580195 | 3.97E-06 | 0.001120304 |
| GOTERM_BP_ALL | GO:0007275~multicellular organism development                       | 244   | 34.0306834  | 6.55E-06 | 0.001763704 |
| GOTERM_BP_ALL | GO:0035987~endodermal cell differentiation                          | 11    | 1.534170153 | 7.54E-06 | 0.001917167 |
| GOTERM_BP_ALL | GO:0016477~cell migration                                           | 78    | 10.87866109 | 7.76E-06 | 0.001917167 |
| GOTERM_BP_ALL | GO:0051674~localization of cell                                     | 85    | 11.85495119 | 8.90E-06 | 0.001997713 |
| GOTERM_BP_ALL | GO:0048870~cell motility                                            | 85    | 11.85495119 | 8.90E-06 | 0.001997713 |
| GOTERM_BP_ALL | GO:0044260~cellular macromolecule metabolic process                 | 385   | 53.69595537 | 9.10E-06 | 0.001997713 |
| GOTERM_BP_ALL | GO:0001501~skeletal system development                              | 41    | 5.718270572 | 1.04E-05 | 0.002089266 |
| GOTERM_BP_ALL | GO:0071704~organic substance metabolic process                      | 473   | 65.9693166  | 1.04E-05 | 0.002089266 |
| GOTERM_BP_ALL | GO:0010033~response to organic substance                            | 154   | 21.47838215 | 1.07E-05 | 0.002089266 |
| GOTERM_BP_ALL | GO:0048514~blood vessel morphogenesis                               | 41    | 5.718270572 | 1.09E-05 | 0.002089266 |
| GOTERM_BP_ALL | GO:0048731~system development                                       | 217   | 30.26499303 | 1.54E-05 | 0.002806703 |
| GOTERM_BP_ALL | GO:2000145~regulation of cell motility                              | 54    | 7.531380753 | 1.56E-05 | 0.002806703 |
| GOTERM_BP_ALL | GO:0008152~metabolic process                                        | 485   | 67.64295676 | 1.95E-05 | 0.003390691 |
| GOTERM_BP_ALL | GO:0016485~protein processing                                       | 25    | 3.486750349 | 2.05E-05 | 0.003469374 |
| GOTERM_BP_ALL | GO:0050793~regulation of developmental process                      | 121   | 16.87587169 | 2.30E-05 | 0.003785446 |
| GOTERM_BP_ALL | GO:0010810~regulation of cell-substrate adhesion                    | 21    | 2.928870293 | 2.59E-05 | 0.004147702 |
| GOTERM_BP_ALL | GO:0048646~anatomical structure formation involved in morphogenesis | 74    | 10.32078103 | 3.21E-05 | 0.004885607 |
| GOTERM_BP_ALL | GO:0009888~tissue development                                       | 103   | 14.36541144 | 3.21E-05 | 0.004885607 |
| GOTERM_BP_ALL | GO:0048856~anatomical structure development                         | 264   | 36.82008368 | 3.75E-05 | 0.005563273 |
| GOTERM_BP_ALL | GO:0001525~angiogenesis                                             | 35    | 4.881450488 | 4.08E-05 | 0.005800932 |
| GOTERM_BP_ALL | GO:0001706~endoderm formation                                       | 11    | 1.534170153 | 4.11E-05 | 0.005800932 |
| GOTERM_BP_ALL | GO:1904035~regulation of epithelial cell apoptotic process          | 12    | 1.673640167 | 4.77E-05 | 0.006529371 |
| GOTERM_BP_ALL | GO:0040012~regulation of locomotion                                 | 54    | 7.531380753 | 4.85E-05 | 0.006529371 |
| GOTERM_BP_ALL | GO:0006508~proteolysis                                              | 99    | 13.80753138 | 5.35E-05 | 0.007053073 |
| GOTERM_BP_ALL | GO:0044767~single-organism developmental process                    | 263   | 36.68061367 | 5.65E-05 | 0.007277681 |
| GOTERM_BP_ALL | GO:2000026~regulation of multicellular organismal development       | 100   | 13.94700139 | 6.27E-05 | 0.007903283 |
| GOTERM_BP_ALL | GO:0051604~protein maturation                                       | 26    | 3.626220363 | 7.05E-05 | 0.008708851 |
| GOTERM_BP_ALL | GO:0048251~elastic fiber assembly                                   | 5     | 0.69735007  | 7.53E-05 | 0.009106442 |
| GOTERM_BP_ALL | GO:0019538~protein metabolic process                                | 261   | 36.40167364 | 8.36E-05 | 0.009904879 |
| GOTERM_BP_ALL | GO:0030335~positive regulation of cell migration                    | 33    | 4.60251046  | 9.30E-05 | 0.01081345  |
| GOTERM_BP_ALL | GO:0040011~locomotion                                               | 90    | 12.55230126 | 1.03E-04 | 0.011713645 |
| GOTERM_BP_ALL | GO:0044238~primary metabolic process                                | 449   | 62.62203626 | 1.09E-04 | 0.012204685 |
| GOTERM_BP_ALL | GO:0043412~macromolecule modification                               | 202   | 28.17294282 | 1.14E-04 | 0.01250485  |
| GOTERM_BP_ALL | GO:0032502~developmental process                                    | 267   | 37.23849372 | 1.23E-04 | 0.013276991 |

|               |                                                                             |     |             |             |             |
|---------------|-----------------------------------------------------------------------------|-----|-------------|-------------|-------------|
| GOTERM_BP_ALL | GO:0051270~regulation of cellular component movement                        | 54  | 7.531380753 | 1.52E-04    | 0.016070181 |
| GOTERM_BP_ALL | GO:0044710~single-organism metabolic process                                | 201 | 28.0334728  | 1.57E-04    | 0.016345285 |
| GOTERM_BP_ALL | GO:0061448~connective tissue development                                    | 23  | 3.207810321 | 1.62E-04    | 0.016592633 |
| GOTERM_BP_ALL | GO:2000147~positive regulation of cell motility                             | 33  | 4.60251046  | 1.75E-04    | 0.017607844 |
| GOTERM_BP_ALL | GO:1904019~epithelial cell apoptotic process                                | 13  | 1.813110181 | 1.83E-04    | 0.018061456 |
| GOTERM_BP_ALL | GO:0007160~cell-matrix adhesion                                             | 20  | 2.789400279 | 2.09E-04    | 0.020272211 |
| GOTERM_BP_ALL | GO:0044267~cellular protein metabolic process                               | 235 | 32.77545328 | 2.22E-04    | 0.02121456  |
| GOTERM_BP_ALL | GO:0045595~regulation of cell differentiation                               | 89  | 12.41283124 | 2.33E-04    | 0.02187489  |
| GOTERM_BP_ALL | GO:0051272~positive regulation of cellular component movement               | 33  | 4.60251046  | 2.82E-04    | 0.026133907 |
| GOTERM_BP_ALL | GO:0006928~movement of cell or subcellular component                        | 100 | 13.94700139 | 2.98E-04    | 0.027088579 |
| GOTERM_BP_ALL | GO:0006026~aminoglycan catabolic process                                    | 11  | 1.534170153 | 3.05E-04    | 0.027088579 |
| GOTERM_BP_ALL | GO:0040017~positive regulation of locomotion                                | 33  | 4.60251046  | 3.06E-04    | 0.027088579 |
| GOTERM_BP_ALL | GO:0022603~regulation of anatomical structure morphogenesis                 | 65  | 9.065550907 | 3.13E-04    | 0.027261612 |
| GOTERM_BP_ALL | GO:0051216~cartilage development                                            | 19  | 2.649930265 | 3.27E-04    | 0.028088658 |
| GOTERM_BP_ALL | GO:0085029~extracellular matrix assembly                                    | 7   | 0.976290098 | 3.36E-04    | 0.028484555 |
| GOTERM_BP_ALL | GO:0060284~regulation of cell development                                   | 55  | 7.670850767 | 3.47E-04    | 0.028791894 |
| GOTERM_BP_ALL | GO:0032879~regulation of localization                                       | 130 | 18.13110181 | 3.50E-04    | 0.028791894 |
| GOTERM_BP_ALL | GO:0044707~single-multicellular organism process                            | 276 | 38.49372385 | 3.84E-04    | 0.031210758 |
| GOTERM_BP_ALL | GO:0006464~cellular protein modification process                            | 187 | 26.08089261 | 5.04E-04    | 0.03979106  |
| GOTERM_BP_ALL | GO:0036211~protein modification process                                     | 187 | 26.08089261 | 5.04E-04    | 0.03979106  |
| GOTERM_BP_ALL | GO:0051239~regulation of multicellular organismal process                   | 137 | 19.10739191 | 5.41E-04    | 0.042160913 |
| GOTERM_BP_ALL | GO:0006027~glycosaminoglycan catabolic process                              | 10  | 1.394700139 | 5.90E-04    | 0.044894173 |
| GOTERM_BP_ALL | GO:0044237~cellular metabolic process                                       | 442 | 61.64574616 | 5.91E-04    | 0.044894173 |
| GOTERM_BP_ALL | GO:0007167~enzyme linked receptor protein signaling pathway                 | 59  | 8.228730823 | 6.11E-04    | 0.045845639 |
| GOTERM_BP_ALL | GO:0008285~negative regulation of cell proliferation                        | 44  | 6.136680614 | 6.36E-04    | 0.047102748 |
| GOTERM_BP_ALL | GO:0006865~amino acid transport                                             | 12  | 1.673640167 | 6.50E-04    | 0.047594835 |
| GOTERM_BP_ALL | GO:0003206~cardiac chamber morphogenesis                                    | 14  | 1.952580195 | 7.46E-04    | 0.053918134 |
| GOTERM_BP_ALL | GO:0044085~cellular component biogenesis                                    | 147 | 20.50209205 | 7.80E-04    | 0.055726024 |
| GOTERM_BP_ALL | GO:0007492~endoderm development                                             | 11  | 1.534170153 | 8.38E-04    | 0.058827911 |
| GOTERM_BP_ALL | GO:0071310~cellular response to organic substance                           | 115 | 16.0390516  | 8.44E-04    | 0.058827911 |
| GOTERM_BP_ALL | GO:0097435~fibril organization                                              | 6   | 0.836820084 | 8.76E-04    | 0.060360353 |
| GOTERM_BP_ALL | GO:0030155~regulation of cell adhesion                                      | 43  | 5.9972106   | 9.00E-04    | 0.061248525 |
| GOTERM_BP_ALL | GO:0043206~extracellular fibril organization                                | 5   | 0.69735007  | 9.09E-04    | 0.061248525 |
| GOTERM_BP_ALL | GO:0010811~positive regulation of cell-substrate adhesion                   | 13  | 1.813110181 | 9.25E-04    | 0.061618307 |
| GOTERM_BP_ALL | GO:0008625~extrinsic apoptotic signaling pathway via death domain receptors | 11  | 1.534170153 | 0.001025661 | 0.067545473 |
| GOTERM_BP_ALL | GO:2000351~regulation of endothelial cell apoptotic process                 | 8   | 1.115760112 | 0.001141105 | 0.074322329 |
| GOTERM_BP_ALL | GO:0051179~localization                                                     | 269 | 37.51743375 | 0.001229288 | 0.079195516 |
| GOTERM_BP_ALL | GO:0040013~negative regulation of locomotion                                | 22  | 3.068340307 | 0.001339938 | 0.085395833 |
| GOTERM_BP_ALL | GO:0051271~negative regulation of cellular component movement               | 22  | 3.068340307 | 0.001414143 | 0.089166211 |
| GOTERM_BP_ALL | GO:0007417~central nervous system development                               | 55  | 7.670850767 | 0.001442755 | 0.090012711 |
| GOTERM_BP_ALL | GO:0018193~peptidyl-amino acid modification                                 | 68  | 9.483960948 | 0.001596324 | 0.098556378 |
| GOTERM_BP_ALL | GO:0022607~cellular component assembly                                      | 132 | 18.41004184 | 0.001671799 | 0.101919907 |
| GOTERM_BP_ALL | GO:0040007~growth                                                           | 56  | 7.810320781 | 0.001685195 | 0.101919907 |
| GOTERM_BP_ALL | GO:0043933~macromolecular complex subunit organization                      | 125 | 17.43375174 | 0.001723803 | 0.103201843 |
| GOTERM_BP_ALL | GO:0051128~regulation of cellular component organization                    | 119 | 16.59693166 | 0.001747886 | 0.103597224 |
| GOTERM_BP_ALL | GO:0003007~heart morphogenesis                                              | 20  | 2.789400279 | 0.001883626 | 0.110216193 |
| GOTERM_BP_ALL | GO:0060348~bone development                                                 | 17  | 2.370990237 | 0.001896752 | 0.110216193 |
| GOTERM_BP_ALL | GO:0050900~leukocyte migration                                              | 28  | 3.905160391 | 0.001948917 | 0.112147869 |
| GOTERM_BP_ALL | GO:0032330~regulation of chondrocyte differentiation                        | 8   | 1.115760112 | 0.001976888 | 0.112183349 |
| GOTERM_BP_ALL | GO:0007507~heart development                                                | 35  | 4.881450488 | 0.001987388 | 0.112183349 |
| GOTERM_BP_ALL | GO:0000904~cell morphogenesis involved in differentiation                   | 47  | 6.555090656 | 0.002018249 | 0.112850603 |
| GOTERM_BP_ALL | GO:0051094~positive regulation of developmental process                     | 63  | 8.786610879 | 0.002058927 | 0.114049183 |
| GOTERM_BP_ALL | GO:0010467~gene expression                                                  | 244 | 34.0306834  | 0.002096366 | 0.115047812 |
| GOTERM_BP_ALL | GO:0009719~response to endogenous stimulus                                  | 84  | 11.71548117 | 0.002139058 | 0.116313717 |
| GOTERM_BP_ALL | GO:0072577~endothelial cell apoptotic process                               | 8   | 1.115760112 | 0.002245557 | 0.120223782 |
| GOTERM_BP_ALL | GO:0048513~animal organ development                                         | 153 | 21.33891213 | 0.002251534 | 0.120223782 |
| GOTERM_BP_ALL | GO:0022617~extracellular matrix disassembly                                 | 11  | 1.534170153 | 0.002345111 | 0.124102414 |
| GOTERM_BP_ALL | GO:0016458~gene silencing                                                   | 21  | 2.928870293 | 0.002429601 | 0.127014417 |
| GOTERM_BP_ALL | GO:0007166~cell surface receptor signaling pathway                          | 133 | 18.54951185 | 0.002442997 | 0.127014417 |
| GOTERM_BP_ALL | GO:0051093~negative regulation of developmental process                     | 46  | 6.415620642 | 0.002471529 | 0.127380455 |
| GOTERM_BP_ALL | GO:0009887~organ morphogenesis                                              | 58  | 8.089260809 | 0.002537421 | 0.129649087 |

|               |                                                                                  |     |             |             |             |
|---------------|----------------------------------------------------------------------------------|-----|-------------|-------------|-------------|
| GOTERM_BP_ALL | GO:0048519~negative regulation of biological process                             | 215 | 29.986053   | 0.002697721 | 0.136661456 |
| GOTERM_BP_ALL | GO:0051240~positive regulation of multicellular organismal process               | 78  | 10.87866109 | 0.002895695 | 0.145447338 |
| GOTERM_BP_ALL | GO:0071711~basement membrane organization                                        | 5   | 0.69735007  | 0.002949508 | 0.146905309 |
| GOTERM_BP_ALL | GO:0008283~cell proliferation                                                    | 97  | 13.52859135 | 0.00309086  | 0.152446074 |
| GOTERM_BP_ALL | GO:0035966~response to topologically incorrect protein                           | 17  | 2.370990237 | 0.003112194 | 0.152446074 |
| GOTERM_BP_ALL | GO:0030433~ER-associated ubiquitin-dependent protein catabolic process           | 10  | 1.394700139 | 0.003150281 | 0.153046834 |
| GOTERM_BP_ALL | GO:0048523~negative regulation of cellular process                               | 201 | 28.0334728  | 0.003201904 | 0.154290118 |
| GOTERM_BP_ALL | GO:0036503~ERAD pathway                                                          | 11  | 1.534170153 | 0.003258175 | 0.155621386 |
| GOTERM_BP_ALL | GO:0006986~response to unfolded protein                                          | 16  | 2.231520223 | 0.003282044 | 0.155621386 |
| GOTERM_BP_ALL | GO:1904036~negative regulation of epithelial cell apoptotic process              | 7   | 0.976290098 | 0.003399875 | 0.159929018 |
| GOTERM_BP_ALL | GO:0019511~peptidyl-proline hydroxylation                                        | 5   | 0.69735007  | 0.003738426 | 0.174469713 |
| GOTERM_BP_ALL | GO:2000146~negative regulation of cell motility                                  | 19  | 2.649930265 | 0.003782714 | 0.174778224 |
| GOTERM_BP_ALL | GO:0071495~cellular response to endogenous stimulus                              | 66  | 9.205020921 | 0.003804014 | 0.174778224 |
| GOTERM_BP_ALL | GO:0045597~positive regulation of cell differentiation                           | 50  | 6.973500697 | 0.003880717 | 0.176930849 |
| GOTERM_BP_ALL | GO:0010812~negative regulation of cell-substrate adhesion                        | 8   | 1.115760112 | 0.004034712 | 0.181315574 |
| GOTERM_BP_ALL | GO:0010769~regulation of cell morphogenesis involved in differentiation          | 25  | 3.486750349 | 0.004038073 | 0.181315574 |
| GOTERM_BP_ALL | GO:0043589~skin morphogenesis                                                    | 4   | 0.557880056 | 0.004250826 | 0.189415613 |
| GOTERM_BP_ALL | GO:2000352~negative regulation of endothelial cell apoptotic process             | 6   | 0.836820084 | 0.004282384 | 0.189415613 |
| GOTERM_BP_ALL | GO:0051241~negative regulation of multicellular organismal process               | 58  | 8.089260809 | 0.004393609 | 0.191626835 |
| GOTERM_BP_ALL | GO:0009100~glycoprotein metabolic process                                        | 28  | 3.905160391 | 0.004415682 | 0.191626835 |
| GOTERM_BP_ALL | GO:0034446~substrate adhesion-dependent cell spreading                           | 10  | 1.394700139 | 0.004437044 | 0.191626835 |
| GOTERM_BP_ALL | GO:0007040~lysosome organization                                                 | 8   | 1.115760112 | 0.004494657 | 0.191626835 |
| GOTERM_BP_ALL | GO:0080171~lytic vacuole organization                                            | 8   | 1.115760112 | 0.004494657 | 0.191626835 |
| GOTERM_BP_ALL | GO:0048762~mesenchymal cell differentiation                                      | 16  | 2.231520223 | 0.004526364 | 0.191626835 |
| GOTERM_BP_ALL | GO:0048518~positive regulation of biological process                             | 240 | 33.47280335 | 0.004612221 | 0.193101536 |
| GOTERM_BP_ALL | GO:0015813~L-glutamate transport                                                 | 5   | 0.69735007  | 0.004658937 | 0.193101536 |
| GOTERM_BP_ALL | GO:0018126~protein hydroxylation                                                 | 5   | 0.69735007  | 0.004658937 | 0.193101536 |
| GOTERM_BP_ALL | GO:0030336~negative regulation of cell migration                                 | 18  | 2.510460251 | 0.004756809 | 0.195788922 |
| GOTERM_BP_ALL | GO:0042127~regulation of cell proliferation                                      | 82  | 11.43654114 | 0.004897115 | 0.200173795 |
| GOTERM_BP_ALL | GO:0010720~positive regulation of cell development                               | 32  | 4.463040446 | 0.005154093 | 0.209235015 |
| GOTERM_BP_ALL | GO:0030162~regulation of proteolysis                                             | 43  | 5.9972106   | 0.005218743 | 0.210418279 |
| GOTERM_BP_ALL | GO:0050769~positive regulation of neurogenesis                                   | 27  | 3.765690377 | 0.005594996 | 0.224064485 |
| GOTERM_BP_ALL | GO:0048869~cellular developmental process                                        | 186 | 25.94142259 | 0.005695163 | 0.226545185 |
| GOTERM_BP_ALL | GO:0030968~endoplasmic reticulum unfolded protein response                       | 13  | 1.813110181 | 0.005848469 | 0.231092487 |
| GOTERM_BP_ALL | GO:1904380~endoplasmic reticulum mannose trimming                                | 4   | 0.557880056 | 0.005896522 | 0.231448239 |
| GOTERM_BP_ALL | GO:0035967~cellular response to topologically incorrect protein                  | 14  | 1.952580195 | 0.005951399 | 0.232065401 |
| GOTERM_BP_ALL | GO:0051962~positive regulation of nervous system development                     | 30  | 4.184100418 | 0.006154455 | 0.238414735 |
| GOTERM_BP_ALL | GO:0014031~mesenchymal cell development                                          | 15  | 2.092050209 | 0.006253623 | 0.240683268 |
| GOTERM_BP_ALL | GO:0015807~L-amino acid transport                                                | 7   | 0.976290098 | 0.006363359 | 0.243326656 |
| GOTERM_BP_ALL | GO:0045765~regulation of angiogenesis                                            | 18  | 2.510460251 | 0.006688308 | 0.253553008 |
| GOTERM_BP_ALL | GO:0001704~formation of primary germ layer                                       | 12  | 1.673640167 | 0.006769037 | 0.253553008 |
| GOTERM_BP_ALL | GO:0031399~regulation of protein modification process                            | 86  | 11.9944212  | 0.006800546 | 0.253553008 |
| GOTERM_BP_ALL | GO:0051259~protein oligomerization                                               | 31  | 4.323570432 | 0.006808029 | 0.253553008 |
| GOTERM_BP_ALL | GO:0010975~regulation of neuron projection development                           | 28  | 3.905160391 | 0.006911824 | 0.253553008 |
| GOTERM_BP_ALL | GO:0015800~acidic amino acid transport                                           | 5   | 0.69735007  | 0.006931483 | 0.253553008 |
| GOTERM_BP_ALL | GO:0007035~vacuolar acidification                                                | 5   | 0.69735007  | 0.006931483 | 0.253553008 |
| GOTERM_BP_ALL | GO:0034620~cellular response to unfolded protein                                 | 13  | 1.813110181 | 0.006973029 | 0.253553008 |
| GOTERM_BP_ALL | GO:0060322~head development                                                      | 43  | 5.9972106   | 0.007098345 | 0.254981505 |
| GOTERM_BP_ALL | GO:0033627~cell adhesion mediated by integrin                                    | 7   | 0.976290098 | 0.007128962 | 0.254981505 |
| GOTERM_BP_ALL | GO:0006342~chromatin silencing                                                   | 12  | 1.673640167 | 0.007202206 | 0.254981505 |
| GOTERM_BP_ALL | GO:0010771~negative regulation of cell morphogenesis involved in differentiation | 12  | 1.673640167 | 0.007202206 | 0.254981505 |
| GOTERM_BP_ALL | GO:0000902~cell morphogenesis                                                    | 67  | 9.344490934 | 0.007240229 | 0.254981505 |
| GOTERM_BP_ALL | GO:0046165~alcohol biosynthetic process                                          | 11  | 1.534170153 | 0.007270436 | 0.254981505 |
| GOTERM_BP_ALL | GO:0009056~catabolic process                                                     | 101 | 14.08647141 | 0.007612639 | 0.265412428 |
| GOTERM_BP_ALL | GO:0009057~macromolecule catabolic process                                       | 65  | 9.065550907 | 0.007947655 | 0.274069306 |
| GOTERM_BP_ALL | GO:0007420~brain development                                                     | 41  | 5.718270572 | 0.00795342  | 0.274069306 |
| GOTERM_BP_ALL | GO:0071822~protein complex subunit organization                                  | 86  | 11.9944212  | 0.008017576 | 0.274683079 |
| GOTERM_BP_ALL | GO:1901342~regulation of vasculature development                                 | 19  | 2.649930265 | 0.008202596 | 0.278272288 |
| GOTERM_BP_ALL | GO:0003205~cardiac chamber development                                           | 14  | 1.952580195 | 0.008216239 | 0.278272288 |
| GOTERM_BP_ALL | GO:1903792~negative regulation of anion transport                                | 5   | 0.69735007  | 0.008300614 | 0.279532607 |

|               |                                                                                                            |     |             |             |             |
|---------------|------------------------------------------------------------------------------------------------------------|-----|-------------|-------------|-------------|
| GOTERM_BP_ALL | GO:0042060~wound healing                                                                                   | 34  | 4.741980474 | 0.008652954 | 0.289751741 |
| GOTERM_BP_ALL | GO:0090101~negative regulation of transmembrane receptor protein serine/threonine kinase signaling pathway | 11  | 1.534170153 | 0.008846845 | 0.294580059 |
| GOTERM_BP_ALL | GO:0032989~cellular component morphogenesis                                                                | 70  | 9.762900976 | 0.008975995 | 0.29721073  |
| GOTERM_BP_ALL | GO:0030154~cell differentiation                                                                            | 170 | 23.70990237 | 0.009049432 | 0.297977692 |
| GOTERM_BP_ALL | GO:0010976~positive regulation of neuron projection development                                            | 18  | 2.510460251 | 0.009103571 | 0.298104235 |
| GOTERM_BP_ALL | GO:0015849~organic acid transport                                                                          | 12  | 1.673640167 | 0.009155079 | 0.298143715 |
| GOTERM_BP_ALL | GO:0001932~regulation of protein phosphorylation                                                           | 69  | 9.623430962 | 0.009257772 | 0.299840509 |
| GOTERM_BP_ALL | GO:0009611~response to wounding                                                                            | 39  | 5.439330544 | 0.009336061 | 0.300732781 |
| GOTERM_BP_ALL | GO:0018208~peptidyl-proline modification                                                                   | 8   | 1.115760112 | 0.009723921 | 0.30811722  |
| GOTERM_BP_ALL | GO:1905039~carboxylic acid transmembrane transport                                                         | 8   | 1.115760112 | 0.009723921 | 0.30811722  |
| GOTERM_BP_ALL | GO:0042325~regulation of phosphorylation                                                                   | 73  | 10.18131102 | 0.009835079 | 0.30811722  |
| GOTERM_BP_ALL | GO:0090181~regulation of cholesterol metabolic process                                                     | 5   | 0.69735007  | 0.009835454 | 0.30811722  |
| GOTERM_BP_ALL | GO:0045785~positive regulation of cell adhesion                                                            | 26  | 3.626220363 | 0.00985507  | 0.30811722  |
| GOTERM_BP_ALL | GO:0050808~synapse organization                                                                            | 18  | 2.510460251 | 0.009877218 | 0.30811722  |
| GOTERM_BP_ALL | GO:0002062~chondrocyte differentiation                                                                     | 10  | 1.394700139 | 0.010119229 | 0.312837686 |
| GOTERM_BP_ALL | GO:0071560~cellular response to transforming growth factor beta stimulus                                   | 17  | 2.370990237 | 0.010137553 | 0.312837686 |
| GOTERM_BP_ALL | GO:0036066~protein O-linked fucosylation                                                                   | 4   | 0.557880056 | 0.010194351 | 0.312837686 |
| GOTERM_BP_ALL | GO:0009790~embryo development                                                                              | 53  | 7.391910739 | 0.010239668 | 0.312837686 |
| GOTERM_BP_ALL | GO:0065008~regulation of biological quality                                                                | 165 | 23.0125523  | 0.010343961 | 0.313240052 |
| GOTERM_BP_ALL | GO:0006396~RNA processing                                                                                  | 51  | 7.112970711 | 0.010406258 | 0.313240052 |
| GOTERM_BP_ALL | GO:0070085~glycosylation                                                                                   | 21  | 2.928870293 | 0.010411387 | 0.313240052 |
| GOTERM_BP_ALL | GO:0006695~cholesterol biosynthetic process                                                                | 7   | 0.976290098 | 0.010864046 | 0.325208074 |
| GOTERM_BP_ALL | GO:0071559~response to transforming growth factor beta                                                     | 17  | 2.370990237 | 0.011021796 | 0.327001104 |
| GOTERM_BP_ALL | GO:0045666~positive regulation of neuron differentiation                                                   | 22  | 3.068340307 | 0.011034287 | 0.327001104 |
| GOTERM_BP_ALL | GO:0010955~negative regulation of protein processing                                                       | 6   | 0.836820084 | 0.011291923 | 0.33132291  |
| GOTERM_BP_ALL | GO:1903318~negative regulation of protein maturation                                                       | 6   | 0.836820084 | 0.011291923 | 0.33132291  |
| GOTERM_BP_ALL | GO:0048522~positive regulation of cellular process                                                         | 214 | 29.84658298 | 0.011420249 | 0.333437512 |
| GOTERM_BP_ALL | GO:0032835~glomerulus development                                                                          | 8   | 1.115760112 | 0.011533489 | 0.333736911 |
| GOTERM_BP_ALL | GO:0006517~protein deglycosylation                                                                         | 5   | 0.69735007  | 0.011543119 | 0.333736911 |
| GOTERM_BP_ALL | GO:0016070~RNA metabolic process                                                                           | 210 | 29.28870293 | 0.011631561 | 0.334661461 |
| GOTERM_BP_ALL | GO:0023056~positive regulation of signaling                                                                | 80  | 11.15760112 | 0.011786733 | 0.335033281 |
| GOTERM_BP_ALL | GO:1902653~secondary alcohol biosynthetic process                                                          | 7   | 0.976290098 | 0.011979968 | 0.335033281 |
| GOTERM_BP_ALL | GO:0046718~viral entry into host cell                                                                      | 11  | 1.534170153 | 0.01204017  | 0.335033281 |
| GOTERM_BP_ALL | GO:0051828~entry into other organism involved in symbiotic interaction                                     | 11  | 1.534170153 | 0.01204017  | 0.335033281 |
| GOTERM_BP_ALL | GO:0030260~entry into host cell                                                                            | 11  | 1.534170153 | 0.01204017  | 0.335033281 |
| GOTERM_BP_ALL | GO:0044409~entry into host                                                                                 | 11  | 1.534170153 | 0.01204017  | 0.335033281 |
| GOTERM_BP_ALL | GO:0051806~entry into cell of other organism involved in symbiotic interaction                             | 11  | 1.534170153 | 0.01204017  | 0.335033281 |
| GOTERM_BP_ALL | GO:0050767~regulation of neurogenesis                                                                      | 40  | 5.578800558 | 0.012420563 | 0.341047851 |
| GOTERM_BP_ALL | GO:0051960~regulation of nervous system development                                                        | 44  | 6.136680614 | 0.01251096  | 0.341047851 |
| GOTERM_BP_ALL | GO:1903825~organic acid transmembrane transport                                                            | 8   | 1.115760112 | 0.012524245 | 0.341047851 |
| GOTERM_BP_ALL | GO:0061035~regulation of cartilage development                                                             | 8   | 1.115760112 | 0.012524245 | 0.341047851 |
| GOTERM_BP_ALL | GO:0009101~glycoprotein biosynthetic process                                                               | 24  | 3.347280335 | 0.012870718 | 0.341047851 |
| GOTERM_BP_ALL | GO:0036507~protein demannosylation                                                                         | 4   | 0.557880056 | 0.012870781 | 0.341047851 |
| GOTERM_BP_ALL | GO:0071028~nuclear mRNA surveillance                                                                       | 4   | 0.557880056 | 0.012870781 | 0.341047851 |
| GOTERM_BP_ALL | GO:0071027~nuclear RNA surveillance                                                                        | 4   | 0.557880056 | 0.012870781 | 0.341047851 |
| GOTERM_BP_ALL | GO:0045540~regulation of cholesterol biosynthetic process                                                  | 4   | 0.557880056 | 0.012870781 | 0.341047851 |
| GOTERM_BP_ALL | GO:0036508~protein alpha-1,2-demannosylation                                                               | 4   | 0.557880056 | 0.012870781 | 0.341047851 |
| GOTERM_BP_ALL | GO:0007162~negative regulation of cell adhesion                                                            | 17  | 2.370990237 | 0.012889273 | 0.341047851 |
| GOTERM_BP_ALL | GO:0031401~positive regulation of protein modification process                                             | 61  | 8.507670851 | 0.013187029 | 0.347048668 |
| GOTERM_BP_ALL | GO:0010256~endomembrane system organization                                                                | 34  | 4.741980474 | 0.01323317  | 0.347048668 |
| GOTERM_BP_ALL | GO:0035295~tube development                                                                                | 35  | 4.881450488 | 0.013374116 | 0.349199934 |
| GOTERM_BP_ALL | GO:0031175~neuron projection development                                                                   | 46  | 6.415620642 | 0.014032473 | 0.362572205 |
| GOTERM_BP_ALL | GO:0070887~cellular response to chemical stimulus                                                          | 126 | 17.57322176 | 0.014130935 | 0.362572205 |
| GOTERM_BP_ALL | GO:0048536~spleen development                                                                              | 6   | 0.836820084 | 0.014221651 | 0.362572205 |
| GOTERM_BP_ALL | GO:0045542~positive regulation of cholesterol biosynthetic process                                         | 3   | 0.418410042 | 0.01425193  | 0.362572205 |
| GOTERM_BP_ALL | GO:0010757~negative regulation of plasminogen activation                                                   | 3   | 0.418410042 | 0.01425193  | 0.362572205 |
| GOTERM_BP_ALL | GO:0001935~endothelial cell proliferation                                                                  | 11  | 1.534170153 | 0.014333813 | 0.362572205 |
| GOTERM_BP_ALL | GO:0006486~protein glycosylation                                                                           | 20  | 2.789400279 | 0.014375648 | 0.362572205 |
| GOTERM_BP_ALL | GO:0043413~macromolecule glycosylation                                                                     | 20  | 2.789400279 | 0.014375648 | 0.362572205 |

|               |                                                                               |     |             |             |             |
|---------------|-------------------------------------------------------------------------------|-----|-------------|-------------|-------------|
| GOTERM_BP_ALL | GO:0010647~positive regulation of cell communication                          | 79  | 11.0181311  | 0.0145189   | 0.364551627 |
| GOTERM_BP_ALL | GO:0006629~lipid metabolic process                                            | 69  | 9.623430962 | 0.014577145 | 0.364551627 |
| GOTERM_BP_ALL | GO:0006399~tRNA metabolic process                                             | 15  | 2.092050209 | 0.014643488 | 0.364672066 |
| GOTERM_BP_ALL | GO:0001667~ameboidal-type cell migration                                      | 22  | 3.068340307 | 0.015311559 | 0.379713854 |
| GOTERM_BP_ALL | GO:1904037~positive regulation of epithelial cell apoptotic process           | 5   | 0.69735007  | 0.015502301 | 0.381253676 |
| GOTERM_BP_ALL | GO:0006465~signal peptide processing                                          | 5   | 0.69735007  | 0.015502301 | 0.381253676 |
| GOTERM_BP_ALL | GO:0051966~regulation of synaptic transmission, glutamatergic                 | 7   | 0.976290098 | 0.015807614 | 0.387155908 |
| GOTERM_BP_ALL | GO:0044255~cellular lipid metabolic process                                   | 56  | 7.810320781 | 0.015900667 | 0.387832314 |
| GOTERM_BP_ALL | GO:0097191~extrinsic apoptotic signaling pathway                              | 17  | 2.370990237 | 0.016264022 | 0.395069087 |
| GOTERM_BP_ALL | GO:0001558~regulation of cell growth                                          | 26  | 3.626220363 | 0.016724019 | 0.40458474  |
| GOTERM_BP_ALL | GO:0001936~regulation of endothelial cell proliferation                       | 10  | 1.394700139 | 0.016849438 | 0.405961858 |
| GOTERM_BP_ALL | GO:0033554~cellular response to stress                                        | 88  | 12.27336123 | 0.017102495 | 0.410390643 |
| GOTERM_BP_ALL | GO:0070848~response to growth factor                                          | 37  | 5.160390516 | 0.017241661 | 0.410648782 |
| GOTERM_BP_ALL | GO:0003333~amino acid transmembrane transport                                 | 7   | 0.976290098 | 0.017251822 | 0.410648782 |
| GOTERM_BP_ALL | GO:0044723~single-organism carbohydrate metabolic process                     | 38  | 5.29986053  | 0.017744597 | 0.419493095 |
| GOTERM_BP_ALL | GO:0050820~positive regulation of coagulation                                 | 5   | 0.69735007  | 0.017764935 | 0.419493095 |
| GOTERM_BP_ALL | GO:0003231~cardiac ventricle development                                      | 11  | 1.534170153 | 0.017880818 | 0.420554002 |
| GOTERM_BP_ALL | GO:0010721~negative regulation of cell development                            | 21  | 2.928870293 | 0.018335175 | 0.427796166 |
| GOTERM_BP_ALL | GO:0045814~negative regulation of gene expression, epigenetic                 | 12  | 1.673640167 | 0.018399352 | 0.427796166 |
| GOTERM_BP_ALL | GO:0007369~gastrulation                                                       | 14  | 1.952580195 | 0.018405268 | 0.427796166 |
| GOTERM_BP_ALL | GO:0060548~negative regulation of cell death                                  | 49  | 6.834030683 | 0.018646453 | 0.431709087 |
| GOTERM_BP_ALL | GO:0016126~sterol biosynthetic process                                        | 7   | 0.976290098 | 0.018784164 | 0.433205207 |
| GOTERM_BP_ALL | GO:0071025~RNA surveillance                                                   | 4   | 0.557880056 | 0.019316871 | 0.443763943 |
| GOTERM_BP_ALL | GO:0006665~sphingolipid metabolic process                                     | 13  | 1.813110181 | 0.019406415 | 0.444099706 |
| GOTERM_BP_ALL | GO:0006468~protein phosphorylation                                            | 91  | 12.69177127 | 0.019697994 | 0.447646026 |
| GOTERM_BP_ALL | GO:0036498~IRE1-mediated unfolded protein response                            | 8   | 1.115760112 | 0.019787963 | 0.447646026 |
| GOTERM_BP_ALL | GO:0010717~regulation of epithelial to mesenchymal transition                 | 8   | 1.115760112 | 0.019787963 | 0.447646026 |
| GOTERM_BP_ALL | GO:0010941~regulation of cell death                                           | 76  | 10.59972106 | 0.019914171 | 0.448788183 |
| GOTERM_BP_ALL | GO:0051246~regulation of protein metabolic process                            | 119 | 16.59693166 | 0.020051393 | 0.450168961 |
| GOTERM_BP_ALL | GO:0044712~single-organism catabolic process                                  | 46  | 6.415620642 | 0.020394049 | 0.456134068 |
| GOTERM_BP_ALL | GO:0090205~positive regulation of cholesterol metabolic process               | 3   | 0.418410042 | 0.020824937 | 0.460557462 |
| GOTERM_BP_ALL | GO:0032914~positive regulation of transforming growth factor beta1 production | 3   | 0.418410042 | 0.020824937 | 0.460557462 |
| GOTERM_BP_ALL | GO:1903224~regulation of endodermal cell differentiation                      | 3   | 0.418410042 | 0.020824937 | 0.460557462 |
| GOTERM_BP_ALL | GO:0098657~import into cell                                                   | 8   | 1.115760112 | 0.021234695 | 0.466140881 |
| GOTERM_BP_ALL | GO:0071260~cellular response to mechanical stimulus                           | 8   | 1.115760112 | 0.021234695 | 0.466140881 |
| GOTERM_BP_ALL | GO:0030324~lung development                                                   | 14  | 1.952580195 | 0.021801354 | 0.476814125 |
| GOTERM_BP_ALL | GO:1903036~positive regulation of response to wounding                        | 7   | 0.976290098 | 0.022122129 | 0.48031386  |
| GOTERM_BP_ALL | GO:0007033~vacuole organization                                               | 16  | 2.231520223 | 0.022123449 | 0.48031386  |
| GOTERM_BP_ALL | GO:0003208~cardiac ventricle morphogenesis                                    | 8   | 1.115760112 | 0.022753257 | 0.49218451  |
| GOTERM_BP_ALL | GO:0098739~import across plasma membrane                                      | 5   | 0.69735007  | 0.022879323 | 0.49311181  |
| GOTERM_BP_ALL | GO:0060841~venous blood vessel development                                    | 4   | 0.557880056 | 0.023093955 | 0.495934326 |
| GOTERM_BP_ALL | GO:0060255~regulation of macromolecule metabolic process                      | 254 | 35.42538354 | 0.02341861  | 0.499300424 |
| GOTERM_BP_ALL | GO:0005975~carbohydrate metabolic process                                     | 43  | 5.9972106   | 0.023419186 | 0.499300424 |
| GOTERM_BP_ALL | GO:0006509~membrane protein ectodomain proteolysis                            | 6   | 0.836820084 | 0.023664159 | 0.50106934  |
| GOTERM_BP_ALL | GO:0007229~integrin-mediated signaling pathway                                | 10  | 1.394700139 | 0.023707024 | 0.50106934  |
| GOTERM_BP_ALL | GO:0007169~transmembrane receptor protein tyrosine kinase signaling pathway   | 37  | 5.160390516 | 0.023755776 | 0.50106934  |
| GOTERM_BP_ALL | GO:0052547~regulation of peptidase activity                                   | 25  | 3.486750349 | 0.023907969 | 0.502491259 |
| GOTERM_BP_ALL | GO:0006914~autophagy                                                          | 26  | 3.626220363 | 0.024187936 | 0.506579149 |
| GOTERM_BP_ALL | GO:0001934~positive regulation of protein phosphorylation                     | 48  | 6.694560669 | 0.024467219 | 0.510623965 |
| GOTERM_BP_ALL | GO:0080090~regulation of primary metabolic process                            | 253 | 35.28591353 | 0.024897377 | 0.515866115 |
| GOTERM_BP_ALL | GO:0002576~platelet degranulation                                             | 10  | 1.394700139 | 0.025018491 | 0.515866115 |
| GOTERM_BP_ALL | GO:0030168~platelet activation                                                | 13  | 1.813110181 | 0.02525132  | 0.515866115 |
| GOTERM_BP_ALL | GO:0071363~cellular response to growth factor stimulus                        | 35  | 4.881450488 | 0.025283049 | 0.515866115 |
| GOTERM_BP_ALL | GO:1902533~positive regulation of intracellular signal transduction           | 49  | 6.834030683 | 0.025351318 | 0.515866115 |
| GOTERM_BP_ALL | GO:0071496~cellular response to external stimulus                             | 18  | 2.510460251 | 0.02536884  | 0.515866115 |
| GOTERM_BP_ALL | GO:0050878~regulation of body fluid levels                                    | 30  | 4.184100418 | 0.025492521 | 0.515866115 |
| GOTERM_BP_ALL | GO:0048468~cell development                                                   | 95  | 13.24965132 | 0.025503327 | 0.515866115 |
| GOTERM_BP_ALL | GO:1904018~positive regulation of vasculature development                     | 12  | 1.673640167 | 0.025604742 | 0.515866115 |
| GOTERM_BP_ALL | GO:0030323~respiratory tube development                                       | 14  | 1.952580195 | 0.025644099 | 0.515866115 |
| GOTERM_BP_ALL | GO:0032268~regulation of cellular protein metabolic process                   | 111 | 15.48117155 | 0.025675806 | 0.515866115 |

|               |                                                                                        |     |             |             |             |
|---------------|----------------------------------------------------------------------------------------|-----|-------------|-------------|-------------|
| GOTERM_BP_ALL | GO:0061061~muscle structure development                                                | 34  | 4.741980474 | 0.025780448 | 0.516218634 |
| GOTERM_BP_ALL | GO:0022604~regulation of cell morphogenesis                                            | 33  | 4.60251046  | 0.026174614 | 0.522346596 |
| GOTERM_BP_ALL | GO:0007219~Notch signaling pathway                                                     | 13  | 1.813110181 | 0.026338507 | 0.523853467 |
| GOTERM_BP_ALL | GO:0006925~inflammatory cell apoptotic process                                         | 4   | 0.557880056 | 0.027241569 | 0.540002603 |
| GOTERM_BP_ALL | GO:0051641~cellular localization                                                       | 119 | 16.59693166 | 0.027363314 | 0.540607874 |
| GOTERM_BP_ALL | GO:0009612~response to mechanical stimulus                                             | 15  | 2.092050209 | 0.027724058 | 0.54291416  |
| GOTERM_BP_ALL | GO:1901136~carbohydrate derivative catabolic process                                   | 14  | 1.952580195 | 0.027742529 | 0.54291416  |
| GOTERM_BP_ALL | GO:0016525~negative regulation of angiogenesis                                         | 8   | 1.115760112 | 0.027754849 | 0.54291416  |
| GOTERM_BP_ALL | GO:0048598~embryonic morphogenesis                                                     | 33  | 4.60251046  | 0.027928371 | 0.544511356 |
| GOTERM_BP_ALL | GO:0032270~positive regulation of cellular protein metabolic process                   | 71  | 9.90237099  | 0.028151031 | 0.544811303 |
| GOTERM_BP_ALL | GO:0045766~positive regulation of angiogenesis                                         | 11  | 1.534170153 | 0.028163239 | 0.544811303 |
| GOTERM_BP_ALL | GO:0044273~sulfur compound catabolic process                                           | 6   | 0.836820084 | 0.028352326 | 0.544811303 |
| GOTERM_BP_ALL | GO:2000542~negative regulation of gastrulation                                         | 3   | 0.418410042 | 0.028403356 | 0.544811303 |
| GOTERM_BP_ALL | GO:0048050~post-embryonic eye morphogenesis                                            | 3   | 0.418410042 | 0.028403356 | 0.544811303 |
| GOTERM_BP_ALL | GO:0042981~regulation of apoptotic process                                             | 70  | 9.762900976 | 0.029265802 | 0.559454315 |
| GOTERM_BP_ALL | GO:0006915~apoptotic process                                                           | 85  | 11.85495119 | 0.029355541 | 0.559454315 |
| GOTERM_BP_ALL | GO:0006835~dicarboxylic acid transport                                                 | 8   | 1.115760112 | 0.029575354 | 0.561836938 |
| GOTERM_BP_ALL | GO:0007399~nervous system development                                                  | 103 | 14.36541144 | 0.029723809 | 0.562031757 |
| GOTERM_BP_ALL | GO:0001952~regulation of cell-matrix adhesion                                          | 9   | 1.255230126 | 0.029850607 | 0.562031757 |
| GOTERM_BP_ALL | GO:0019222~regulation of metabolic process                                             | 267 | 37.23849372 | 0.029870087 | 0.562031757 |
| GOTERM_BP_ALL | GO:0045596~negative regulation of cell differentiation                                 | 36  | 5.020920502 | 0.030623755 | 0.574389219 |
| GOTERM_BP_ALL | GO:0040029~regulation of gene expression, epigenetic                                   | 18  | 2.510460251 | 0.030810267 | 0.576064519 |
| GOTERM_BP_ALL | GO:0006643~membrane lipid metabolic process                                            | 15  | 2.092050209 | 0.030916008 | 0.576223834 |
| GOTERM_BP_ALL | GO:2000181~negative regulation of blood vessel morphogenesis                           | 8   | 1.115760112 | 0.03147469  | 0.584797769 |
| GOTERM_BP_ALL | GO:0016075~rRNA catabolic process                                                      | 4   | 0.557880056 | 0.031758095 | 0.586675429 |
| GOTERM_BP_ALL | GO:0009967~positive regulation of signal transduction                                  | 71  | 9.90237099  | 0.031773716 | 0.586675429 |
| GOTERM_BP_ALL | GO:0007517~muscle organ development                                                    | 23  | 3.207810321 | 0.031879044 | 0.586792211 |
| GOTERM_BP_ALL | GO:0003209~cardiac atrium morphogenesis                                                | 5   | 0.69735007  | 0.032073958 | 0.588552165 |
| GOTERM_BP_ALL | GO:0014070~response to organic cyclic compound                                         | 48  | 6.694560669 | 0.032218612 | 0.589381834 |
| GOTERM_BP_ALL | GO:0042327~positive regulation of phosphorylation                                      | 49  | 6.834030683 | 0.033357386 | 0.60451898  |
| GOTERM_BP_ALL | GO:0043067~regulation of programmed cell death                                         | 70  | 9.762900976 | 0.033410341 | 0.60451898  |
| GOTERM_BP_ALL | GO:0050673~epithelial cell proliferation                                               | 22  | 3.068340307 | 0.033446637 | 0.60451898  |
| GOTERM_BP_ALL | GO:0007041~lysosomal transport                                                         | 8   | 1.115760112 | 0.033454062 | 0.60451898  |
| GOTERM_BP_ALL | GO:0010632~regulation of epithelial cell migration                                     | 13  | 1.813110181 | 0.034922805 | 0.629141238 |
| GOTERM_BP_ALL | GO:0031647~regulation of protein stability                                             | 16  | 2.231520223 | 0.035540152 | 0.636643935 |
| GOTERM_BP_ALL | GO:0001937~negative regulation of endothelial cell proliferation                       | 5   | 0.69735007  | 0.035554099 | 0.636643935 |
| GOTERM_BP_ALL | GO:0097190~apoptotic signaling pathway                                                 | 33  | 4.60251046  | 0.035904023 | 0.640973329 |
| GOTERM_BP_ALL | GO:0060411~cardiac septum morphogenesis                                                | 7   | 0.976290098 | 0.036876538 | 0.654778132 |
| GOTERM_BP_ALL | GO:0072102~glomerulus morphogenesis                                                    | 3   | 0.418410042 | 0.036898245 | 0.654778132 |
| GOTERM_BP_ALL | GO:0010594~regulation of endothelial cell migration                                    | 10  | 1.394700139 | 0.037406589 | 0.660819461 |
| GOTERM_BP_ALL | GO:0090304~nucleic acid metabolic process                                              | 225 | 31.38075314 | 0.037461674 | 0.660819461 |
| GOTERM_BP_ALL | GO:0007584~response to nutrient                                                        | 13  | 1.813110181 | 0.037703492 | 0.662138891 |
| GOTERM_BP_ALL | GO:0031325~positive regulation of cellular metabolic process                           | 130 | 18.13110181 | 0.037759903 | 0.662138891 |
| GOTERM_BP_ALL | GO:0016049~cell growth                                                                 | 26  | 3.626220363 | 0.037987713 | 0.664168661 |
| GOTERM_BP_ALL | GO:0040008~regulation of growth                                                        | 36  | 5.020920502 | 0.038439333 | 0.669061238 |
| GOTERM_BP_ALL | GO:0033157~regulation of intracellular protein transport                               | 23  | 3.207810321 | 0.038493316 | 0.669061238 |
| GOTERM_BP_ALL | GO:0033036~macromolecule localization                                                  | 129 | 17.9916318  | 0.039541276 | 0.685266505 |
| GOTERM_BP_ALL | GO:0022411~cellular component disassembly                                              | 29  | 4.044630404 | 0.039874184 | 0.689021257 |
| GOTERM_BP_ALL | GO:0009725~response to hormone                                                         | 45  | 6.276150628 | 0.040273296 | 0.693894833 |
| GOTERM_BP_ALL | GO:0001654~eye development                                                             | 21  | 2.928870293 | 0.04074237  | 0.698046246 |
| GOTERM_BP_ALL | GO:0043542~endothelial cell migration                                                  | 12  | 1.673640167 | 0.040749789 | 0.698046246 |
| GOTERM_BP_ALL | GO:0032331~negative regulation of chondrocyte differentiation                          | 4   | 0.557880056 | 0.041882882 | 0.711288949 |
| GOTERM_BP_ALL | GO:0060445~branching involved in salivary gland morphogenesis                          | 4   | 0.557880056 | 0.041882882 | 0.711288949 |
| GOTERM_BP_ALL | GO:1902932~positive regulation of alcohol biosynthetic process                         | 4   | 0.557880056 | 0.041882882 | 0.711288949 |
| GOTERM_BP_ALL | GO:0010952~positive regulation of peptidase activity                                   | 12  | 1.673640167 | 0.042380186 | 0.717678177 |
| GOTERM_BP_ALL | GO:0099587~inorganic ion import into cell                                              | 5   | 0.69735007  | 0.043143905 | 0.720476202 |
| GOTERM_BP_ALL | GO:1902930~regulation of alcohol biosynthetic process                                  | 5   | 0.69735007  | 0.043143905 | 0.720476202 |
| GOTERM_BP_ALL | GO:0098659~inorganic cation import into cell                                           | 5   | 0.69735007  | 0.043143905 | 0.720476202 |
| GOTERM_BP_ALL | GO:0017015~regulation of transforming growth factor beta receptor signaling pathway    | 9   | 1.255230126 | 0.043153206 | 0.720476202 |
| GOTERM_BP_ALL | GO:1903844~regulation of cellular response to transforming growth factor beta stimulus | 9   | 1.255230126 | 0.043153206 | 0.720476202 |

|               |                                                                                                 |     |             |             |             |
|---------------|-------------------------------------------------------------------------------------------------|-----|-------------|-------------|-------------|
| GOTERM_BP_ALL | GO:0060485~mesenchyme development                                                               | 16  | 2.231520223 | 0.043430224 | 0.723064424 |
| GOTERM_BP_ALL | GO:0045862~positive regulation of proteolysis                                                   | 22  | 3.068340307 | 0.04370739  | 0.723074563 |
| GOTERM_BP_ALL | GO:0050817~coagulation                                                                          | 22  | 3.068340307 | 0.04370739  | 0.723074563 |
| GOTERM_BP_ALL | GO:0042221~response to chemical                                                                 | 182 | 25.38354254 | 0.043833831 | 0.723074563 |
| GOTERM_BP_ALL | GO:0046942~carboxylic acid transport                                                            | 18  | 2.510460251 | 0.043918819 | 0.723074563 |
| GOTERM_BP_ALL | GO:0031344~regulation of cell projection organization                                           | 32  | 4.463040446 | 0.044228449 | 0.726155174 |
| GOTERM_BP_ALL | GO:1901343~negative regulation of vasculature development                                       | 8   | 1.115760112 | 0.044588638 | 0.728035413 |
| GOTERM_BP_ALL | GO:0070613~regulation of protein processing                                                     | 8   | 1.115760112 | 0.044588638 | 0.728035413 |
| GOTERM_BP_ALL | GO:0034332~adherens junction organization                                                       | 10  | 1.394700139 | 0.044946383 | 0.731860476 |
| GOTERM_BP_ALL | GO:0051234~establishment of localization                                                        | 209 | 29.14923291 | 0.045261017 | 0.734964508 |
| GOTERM_BP_ALL | GO:0090303~positive regulation of wound healing                                                 | 6   | 0.836820084 | 0.045764692 | 0.740491806 |
| GOTERM_BP_ALL | GO:0032905~transforming growth factor beta1 production                                          | 3   | 0.418410042 | 0.046226079 | 0.740491806 |
| GOTERM_BP_ALL | GO:0032908~regulation of transforming growth factor beta1 production                            | 3   | 0.418410042 | 0.046226079 | 0.740491806 |
| GOTERM_BP_ALL | GO:1901409~positive regulation of phosphorylation of RNA polymerase II C-terminal domain        | 3   | 0.418410042 | 0.046226079 | 0.740491806 |
| GOTERM_BP_ALL | GO:0048563~post-embryonic organ morphogenesis                                                   | 3   | 0.418410042 | 0.046226079 | 0.740491806 |
| GOTERM_BP_ALL | GO:0043066~negative regulation of apoptotic process                                             | 43  | 5.9972106   | 0.046852704 | 0.74487632  |
| GOTERM_BP_ALL | GO:1903317~regulation of protein maturation                                                     | 8   | 1.115760112 | 0.047069488 | 0.74487632  |
| GOTERM_BP_ALL | GO:0051897~positive regulation of protein kinase B signaling                                    | 8   | 1.115760112 | 0.047069488 | 0.74487632  |
| GOTERM_BP_ALL | GO:0043277~apoptotic cell clearance                                                             | 5   | 0.69735007  | 0.047253838 | 0.74487632  |
| GOTERM_BP_ALL | GO:2000736~regulation of stem cell differentiation                                              | 5   | 0.69735007  | 0.047253838 | 0.74487632  |
| GOTERM_BP_ALL | GO:0003230~cardiac atrium development                                                           | 5   | 0.69735007  | 0.047253838 | 0.74487632  |
| GOTERM_BP_ALL | GO:0051701~interaction with host                                                                | 12  | 1.673640167 | 0.047539872 | 0.747397407 |
| GOTERM_BP_ALL | GO:0031667~response to nutrient levels                                                          | 24  | 3.347280335 | 0.048306218 | 0.753773583 |
| GOTERM_BP_ALL | GO:0000377~RNA splicing, via transesterification reactions with bulged adenosine as nucleophile | 19  | 2.649930265 | 0.048326972 | 0.753773583 |
| GOTERM_BP_ALL | GO:0000398~mRNA splicing, via spliceosome                                                       | 19  | 2.649930265 | 0.048326972 | 0.753773583 |
| GOTERM_BP_ALL | GO:0051291~protein heterooligomerization                                                        | 10  | 1.394700139 | 0.049071504 | 0.759744372 |
| GOTERM_BP_ALL | GO:0048729~tissue morphogenesis                                                                 | 34  | 4.741980474 | 0.049166645 | 0.759744372 |
| GOTERM_BP_ALL | GO:0007156~homophilic cell adhesion via plasma membrane adhesion molecules                      | 12  | 1.673640167 | 0.049350697 | 0.759744372 |
| GOTERM_BP_ALL | GO:0031047~gene silencing by RNA                                                                | 12  | 1.673640167 | 0.049350697 | 0.759744372 |
| GOTERM_BP_ALL | GO:0007179~transforming growth factor beta receptor signaling pathway                           | 12  | 1.673640167 | 0.049350697 | 0.759744372 |
| GOTERM_BP_ALL | GO:0007596~blood coagulation                                                                    | 21  | 2.928870293 | 0.0498629   | 0.765640948 |
| GOTERM_BP_ALL | GO:0031323~regulation of cellular metabolic process                                             | 251 | 35.0069735  | 0.049994894 | 0.765684067 |
| GOTERM_BP_ALL | GO:0006807~nitrogen compound metabolic process                                                  | 295 | 41.14365411 | 0.050223001 | 0.767195174 |
| GOTERM_BP_ALL | GO:0010595~positive regulation of endothelial cell migration                                    | 7   | 0.976290098 | 0.050547884 | 0.770173034 |
| GOTERM_BP_ALL | GO:0007178~transmembrane receptor protein serine/threonine kinase signaling pathway             | 20  | 2.789400279 | 0.051246771 | 0.778819511 |
| GOTERM_BP_ALL | GO:1990138~neuron projection extension                                                          | 11  | 1.534170153 | 0.051558704 | 0.781393216 |
| GOTERM_BP_ALL | GO:0042063~gliogenesis                                                                          | 16  | 2.231520223 | 0.051789127 | 0.781393216 |
| GOTERM_BP_ALL | GO:0022008~neurogenesis                                                                         | 70  | 9.762900976 | 0.051811631 | 0.781393216 |
| GOTERM_BP_ALL | GO:0009966~regulation of signal transduction                                                    | 124 | 17.29428173 | 0.052015972 | 0.782434681 |
| GOTERM_BP_ALL | GO:0006493~protein O-linked glycosylation                                                       | 9   | 1.255230126 | 0.052276722 | 0.782434681 |
| GOTERM_BP_ALL | GO:0001837~epithelial to mesenchymal transition                                                 | 9   | 1.255230126 | 0.052276722 | 0.782434681 |
| GOTERM_BP_ALL | GO:0016310~phosphorylation                                                                      | 103 | 14.36541144 | 0.052567183 | 0.783769331 |
| GOTERM_BP_ALL | GO:0051049~regulation of transport                                                              | 85  | 11.85495119 | 0.052760206 | 0.783769331 |
| GOTERM_BP_ALL | GO:0045664~regulation of neuron differentiation                                                 | 31  | 4.323570432 | 0.052902136 | 0.783769331 |
| GOTERM_BP_ALL | GO:0046903~secretion                                                                            | 55  | 7.670850767 | 0.052984528 | 0.783769331 |
| GOTERM_BP_ALL | GO:2001236~regulation of extrinsic apoptotic signaling pathway                                  | 12  | 1.673640167 | 0.053111121 | 0.783769331 |
| GOTERM_BP_ALL | GO:0000375~RNA splicing, via transesterification reactions                                      | 19  | 2.649930265 | 0.053229224 | 0.783769331 |
| GOTERM_BP_ALL | GO:0098743~cell aggregation                                                                     | 4   | 0.557880056 | 0.053423791 | 0.783769331 |
| GOTERM_BP_ALL | GO:0001502~cartilage condensation                                                               | 4   | 0.557880056 | 0.053423791 | 0.783769331 |
| GOTERM_BP_ALL | GO:0010001~glial cell differentiation                                                           | 13  | 1.813110181 | 0.053962216 | 0.785536237 |
| GOTERM_BP_ALL | GO:0006996~organelle organization                                                               | 166 | 23.15202232 | 0.054032165 | 0.785536237 |
| GOTERM_BP_ALL | GO:0030258~lipid modification                                                                   | 17  | 2.370990237 | 0.054253449 | 0.785536237 |
| GOTERM_BP_ALL | GO:0006810~transport                                                                            | 203 | 28.31241283 | 0.054327307 | 0.785536237 |
| GOTERM_BP_ALL | GO:0070727~cellular macromolecule localization                                                  | 77  | 10.73919107 | 0.054575042 | 0.785536237 |
| GOTERM_BP_ALL | GO:0010604~positive regulation of macromolecule metabolic process                               | 129 | 17.9916318  | 0.054638884 | 0.785536237 |
| GOTERM_BP_ALL | GO:1903827~regulation of cellular protein localization                                          | 31  | 4.323570432 | 0.054656563 | 0.785536237 |
| GOTERM_BP_ALL | GO:0008104~protein localization                                                                 | 112 | 15.62064156 | 0.054727071 | 0.785536237 |

|               |                                                                                             |     |             |             |             |
|---------------|---------------------------------------------------------------------------------------------|-----|-------------|-------------|-------------|
| GOTERM_BP_ALL | GO:2001237~negative regulation of extrinsic apoptotic signaling pathway                     | 9   | 1.255230126 | 0.054737045 | 0.785536237 |
| GOTERM_BP_ALL | GO:0048666~neuron development                                                               | 49  | 6.834030683 | 0.055285384 | 0.788126772 |
| GOTERM_BP_ALL | GO:0071526~semaphorin-plexin signaling pathway                                              | 5   | 0.69735007  | 0.056100546 | 0.788126772 |
| GOTERM_BP_ALL | GO:0032964~collagen biosynthetic process                                                    | 5   | 0.69735007  | 0.056100546 | 0.788126772 |
| GOTERM_BP_ALL | GO:0016032~viral process                                                                    | 49  | 6.834030683 | 0.056252151 | 0.788126772 |
| GOTERM_BP_ALL | GO:0032940~secretion by cell                                                                | 49  | 6.834030683 | 0.056252151 | 0.788126772 |
| GOTERM_BP_ALL | GO:1901407~regulation of phosphorylation of RNA polymerase II C-terminal domain             | 3   | 0.418410042 | 0.056308468 | 0.788126772 |
| GOTERM_BP_ALL | GO:0071404~cellular response to low-density lipoprotein particle stimulus                   | 3   | 0.418410042 | 0.056308468 | 0.788126772 |
| GOTERM_BP_ALL | GO:0010755~regulation of plasminogen activation                                             | 3   | 0.418410042 | 0.056308468 | 0.788126772 |
| GOTERM_BP_ALL | GO:0048845~venous blood vessel morphogenesis                                                | 3   | 0.418410042 | 0.056308468 | 0.788126772 |
| GOTERM_BP_ALL | GO:0042493~response to drug                                                                 | 24  | 3.347280335 | 0.05656903  | 0.788126772 |
| GOTERM_BP_ALL | GO:0009893~positive regulation of metabolic process                                         | 137 | 19.10739191 | 0.056575059 | 0.788126772 |
| GOTERM_BP_ALL | GO:0043069~negative regulation of programmed cell death                                     | 43  | 5.9972106   | 0.056655435 | 0.788126772 |
| GOTERM_BP_ALL | GO:0002040~sprouting angiogenesis                                                           | 7   | 0.976290098 | 0.056779168 | 0.788126772 |
| GOTERM_BP_ALL | GO:0008593~regulation of Notch signaling pathway                                            | 7   | 0.976290098 | 0.056779168 | 0.788126772 |
| GOTERM_BP_ALL | GO:0046834~lipid phosphorylation                                                            | 9   | 1.255230126 | 0.057270108 | 0.791235267 |
| GOTERM_BP_ALL | GO:0048675~axon extension                                                                   | 9   | 1.255230126 | 0.057270108 | 0.791235267 |
| GOTERM_BP_ALL | GO:0060541~respiratory system development                                                   | 14  | 1.952580195 | 0.057832122 | 0.795712488 |
| GOTERM_BP_ALL | GO:0051453~regulation of intracellular pH                                                   | 8   | 1.115760112 | 0.057862676 | 0.795712488 |
| GOTERM_BP_ALL | GO:0002009~morphogenesis of an epithelium                                                   | 29  | 4.044630404 | 0.05802515  | 0.796099683 |
| GOTERM_BP_ALL | GO:2000116~regulation of cysteine-type endopeptidase activity                               | 15  | 2.092050209 | 0.058713744 | 0.803686739 |
| GOTERM_BP_ALL | GO:1901617~organic hydroxy compound biosynthetic process                                    | 12  | 1.673640167 | 0.059103971 | 0.805308595 |
| GOTERM_BP_ALL | GO:0010770~positive regulation of cell morphogenesis involved in differentiation            | 12  | 1.673640167 | 0.059103971 | 0.805308595 |
| GOTERM_BP_ALL | GO:0009991~response to extracellular stimulus                                               | 25  | 3.486750349 | 0.059771917 | 0.812541638 |
| GOTERM_BP_ALL | GO:0048592~eye morphogenesis                                                                | 11  | 1.534170153 | 0.060089757 | 0.814993105 |
| GOTERM_BP_ALL | GO:0051896~regulation of protein kinase B signaling                                         | 10  | 1.394700139 | 0.060453192 | 0.816701966 |
| GOTERM_BP_ALL | GO:0044764~multi-organism cellular process                                                  | 49  | 6.834030683 | 0.060518212 | 0.816701966 |
| GOTERM_BP_ALL | GO:0052548~regulation of endopeptidase activity                                             | 22  | 3.068340307 | 0.060629132 | 0.816701966 |
| GOTERM_BP_ALL | GO:0050818~regulation of coagulation                                                        | 8   | 1.115760112 | 0.060780824 | 0.816888765 |
| GOTERM_BP_ALL | GO:0051649~establishment of localization in cell                                            | 93  | 12.9707113  | 0.061310075 | 0.821976287 |
| GOTERM_BP_ALL | GO:0044419~interspecies interaction between organisms                                       | 50  | 6.973500697 | 0.061575413 | 0.821976287 |
| GOTERM_BP_ALL | GO:0044403~symbiosis, encompassing mutualism through parasitism                             | 50  | 6.973500697 | 0.061575413 | 0.821976287 |
| GOTERM_BP_ALL | GO:0051276~chromosome organization                                                          | 58  | 8.089260809 | 0.062014019 | 0.825970985 |
| GOTERM_BP_ALL | GO:0051260~protein homooligomerization                                                      | 17  | 2.370990237 | 0.062440002 | 0.829780029 |
| GOTERM_BP_ALL | GO:0051247~positive regulation of protein metabolic process                                 | 72  | 10.041841   | 0.06279156  | 0.829802035 |
| GOTERM_BP_ALL | GO:0051017~actin filament bundle assembly                                                   | 10  | 1.394700139 | 0.062915985 | 0.829802035 |
| GOTERM_BP_ALL | GO:0090288~negative regulation of cellular response to growth factor stimulus               | 10  | 1.394700139 | 0.062915985 | 0.829802035 |
| GOTERM_BP_ALL | GO:0023051~regulation of signaling                                                          | 137 | 19.10739191 | 0.063001673 | 0.829802035 |
| GOTERM_BP_ALL | GO:0030641~regulation of cellular pH                                                        | 8   | 1.115760112 | 0.063787591 | 0.834926686 |
| GOTERM_BP_ALL | GO:0007034~vacuolar transport                                                               | 18  | 2.510460251 | 0.063968813 | 0.834926686 |
| GOTERM_BP_ALL | GO:0034660~ncRNA metabolic process                                                          | 31  | 4.323570432 | 0.064082039 | 0.834926686 |
| GOTERM_BP_ALL | GO:0033993~response to lipid                                                                | 44  | 6.136680614 | 0.06413791  | 0.834926686 |
| GOTERM_BP_ALL | GO:0010646~regulation of cell communication                                                 | 135 | 18.82845188 | 0.064226474 | 0.834926686 |
| GOTERM_BP_ALL | GO:1902041~regulation of extrinsic apoptotic signaling pathway via death domain receptors   | 6   | 0.836820084 | 0.064235966 | 0.834926686 |
| GOTERM_BP_ALL | GO:1903034~regulation of response to wounding                                               | 11  | 1.534170153 | 0.064679968 | 0.838858137 |
| GOTERM_BP_ALL | GO:0010631~epithelial cell migration                                                        | 15  | 2.092050209 | 0.065619446 | 0.846263507 |
| GOTERM_BP_ALL | GO:0035850~epithelial cell differentiation involved in kidney development                   | 5   | 0.69735007  | 0.065773127 | 0.846263507 |
| GOTERM_BP_ALL | GO:0030030~cell projection organization                                                     | 63  | 8.786610879 | 0.065799507 | 0.846263507 |
| GOTERM_BP_ALL | GO:0035411~catenin import into nucleus                                                      | 4   | 0.557880056 | 0.066316718 | 0.846263507 |
| GOTERM_BP_ALL | GO:0007064~mitotic sister chromatid cohesion                                                | 4   | 0.557880056 | 0.066316718 | 0.846263507 |
| GOTERM_BP_ALL | GO:0036065~fucosylation                                                                     | 4   | 0.557880056 | 0.066316718 | 0.846263507 |
| GOTERM_BP_ALL | GO:0016601~Rac protein signal transduction                                                  | 4   | 0.557880056 | 0.066316718 | 0.846263507 |
| GOTERM_BP_ALL | GO:0032436~positive regulation of proteasomal ubiquitin-dependent protein catabolic process | 7   | 0.976290098 | 0.066953817 | 0.846263507 |
| GOTERM_BP_ALL | GO:0060415~muscle tissue morphogenesis                                                      | 7   | 0.976290098 | 0.066953817 | 0.846263507 |
| GOTERM_BP_ALL | GO:0019220~regulation of phosphate metabolic process                                        | 76  | 10.59972106 | 0.067065523 | 0.846263507 |
| GOTERM_BP_ALL | GO:0070102~interleukin-6-mediated signaling pathway                                         | 3   | 0.418410042 | 0.067071881 | 0.846263507 |



|               |                                                                                                    |     |             |             |             |
|---------------|----------------------------------------------------------------------------------------------------|-----|-------------|-------------|-------------|
| GOTERM_BP_ALL | GO:0051248~negative regulation of protein metabolic process                                        | 52  | 7.252440725 | 0.067372631 | 0.846263507 |
| GOTERM_BP_ALL | GO:0010562~positive regulation of phosphorus metabolic process                                     | 52  | 7.252440725 | 0.067372631 | 0.846263507 |
| GOTERM_BP_ALL | GO:0045937~positive regulation of phosphate metabolic process                                      | 52  | 7.252440725 | 0.067372631 | 0.846263507 |
| GOTERM_BP_ALL | GO:0010605~negative regulation of macromolecule metabolic process                                  | 106 | 14.78382148 | 0.067392673 | 0.846263507 |
| GOTERM_BP_ALL | GO:0033619~membrane protein proteolysis                                                            | 6   | 0.836820084 | 0.068364773 | 0.856655414 |
| GOTERM_BP_ALL | GO:0051174~regulation of phosphorus metabolic process                                              | 76  | 10.59972106 | 0.068799924 | 0.860289339 |
| GOTERM_BP_ALL | GO:0065003~macromolecular complex assembly                                                         | 80  | 11.15760112 | 0.069934916 | 0.872640526 |
| GOTERM_BP_ALL | GO:0070482~response to oxygen levels                                                               | 19  | 2.649930265 | 0.07034635  | 0.875930288 |
| GOTERM_BP_ALL | GO:0010977~negative regulation of neuron projection development                                    | 10  | 1.394700139 | 0.070682637 | 0.87827252  |
| GOTERM_BP_ALL | GO:0048699~generation of neurons                                                                   | 65  | 9.065550907 | 0.07106539  | 0.88078828  |
| GOTERM_BP_ALL | GO:0007599~hemostasis                                                                              | 21  | 2.928870293 | 0.071435925 | 0.88078828  |
| GOTERM_BP_ALL | GO:1901137~carbohydrate derivative biosynthetic process                                            | 39  | 5.439330544 | 0.071481075 | 0.88078828  |
| GOTERM_BP_ALL | GO:0009059~macromolecule biosynthetic process                                                      | 222 | 30.9623431  | 0.071644892 | 0.88078828  |
| GOTERM_BP_ALL | GO:0044283~small molecule biosynthetic process                                                     | 27  | 3.765690377 | 0.071770689 | 0.88078828  |
| GOTERM_BP_ALL | GO:0090132~epithelium migration                                                                    | 15  | 2.092050209 | 0.07177674  | 0.88078828  |
| GOTERM_BP_ALL | GO:0032880~regulation of protein localization                                                      | 48  | 6.694560669 | 0.072275206 | 0.885072619 |
| GOTERM_BP_ALL | GO:0035195~gene silencing by miRNA                                                                 | 6   | 0.836820084 | 0.072637161 | 0.885977112 |
| GOTERM_BP_ALL | GO:1900048~positive regulation of hemostasis                                                       | 4   | 0.557880056 | 0.073245957 | 0.885977112 |
| GOTERM_BP_ALL | GO:0071354~cellular response to interleukin-6                                                      | 4   | 0.557880056 | 0.073245957 | 0.885977112 |
| GOTERM_BP_ALL | GO:0034661~ncRNA catabolic process                                                                 | 4   | 0.557880056 | 0.073245957 | 0.885977112 |
| GOTERM_BP_ALL | GO:0032365~intracellular lipid transport                                                           | 4   | 0.557880056 | 0.073245957 | 0.885977112 |
| GOTERM_BP_ALL | GO:0030194~positive regulation of blood coagulation                                                | 4   | 0.557880056 | 0.073245957 | 0.885977112 |
| GOTERM_BP_ALL | GO:0061572~actin filament bundle organization                                                      | 10  | 1.394700139 | 0.073398282 | 0.886011441 |
| GOTERM_BP_ALL | GO:0048705~skeletal system morphogenesis                                                           | 14  | 1.952580195 | 0.073579887 | 0.886148272 |
| GOTERM_BP_ALL | GO:0001503~ossification                                                                            | 21  | 2.928870293 | 0.073708638 | 0.886148272 |
| GOTERM_BP_ALL | GO:0032434~regulation of proteasomal ubiquitin-dependent protein catabolic process                 | 9   | 1.255230126 | 0.074013955 | 0.888017637 |
| GOTERM_BP_ALL | GO:0042592~homeostatic process                                                                     | 77  | 10.73919107 | 0.074908566 | 0.896935495 |
| GOTERM_BP_ALL | GO:0045861~negative regulation of proteolysis                                                      | 19  | 2.649930265 | 0.075416029 | 0.900930559 |
| GOTERM_BP_ALL | GO:0090092~regulation of transmembrane receptor protein serine/threonine kinase signaling pathway  | 14  | 1.952580195 | 0.075726048 | 0.900930559 |
| GOTERM_BP_ALL | GO:1902531~regulation of intracellular signal transduction                                         | 80  | 11.15760112 | 0.075843231 | 0.900930559 |
| GOTERM_BP_ALL | GO:0032527~protein exit from endoplasmic reticulum                                                 | 5   | 0.69735007  | 0.076253516 | 0.900930559 |
| GOTERM_BP_ALL | GO:0009791~post-embryonic development                                                              | 8   | 1.115760112 | 0.07670358  | 0.900930559 |
| GOTERM_BP_ALL | GO:0045807~positive regulation of endocytosis                                                      | 9   | 1.255230126 | 0.077064014 | 0.900930559 |
| GOTERM_BP_ALL | GO:1904235~regulation of substrate-dependent cell migration, cell attachment to substrate          | 2   | 0.278940028 | 0.077066272 | 0.900930559 |
| GOTERM_BP_ALL | GO:0055095~lipoprotein particle mediated signaling                                                 | 2   | 0.278940028 | 0.077066272 | 0.900930559 |
| GOTERM_BP_ALL | GO:1904237~positive regulation of substrate-dependent cell migration, cell attachment to substrate | 2   | 0.278940028 | 0.077066272 | 0.900930559 |
| GOTERM_BP_ALL | GO:0001300~chronological cell aging                                                                | 2   | 0.278940028 | 0.077066272 | 0.900930559 |
| GOTERM_BP_ALL | GO:0055096~low-density lipoprotein particle mediated signaling                                     | 2   | 0.278940028 | 0.077066272 | 0.900930559 |
| GOTERM_BP_ALL | GO:0097359~UDP-glucosylation                                                                       | 2   | 0.278940028 | 0.077066272 | 0.900930559 |
| GOTERM_BP_ALL | GO:0019218~regulation of steroid metabolic process                                                 | 7   | 0.976290098 | 0.078121682 | 0.904586897 |
| GOTERM_BP_ALL | GO:0034613~cellular protein localization                                                           | 75  | 10.46025105 | 0.078262683 | 0.904586897 |
| GOTERM_BP_ALL | GO:0071402~cellular response to lipoprotein particle stimulus                                      | 3   | 0.418410042 | 0.078447387 | 0.904586897 |
| GOTERM_BP_ALL | GO:0035413~positive regulation of catenin import into nucleus                                      | 3   | 0.418410042 | 0.078447387 | 0.904586897 |
| GOTERM_BP_ALL | GO:0042340~keratan sulfate catabolic process                                                       | 3   | 0.418410042 | 0.078447387 | 0.904586897 |
| GOTERM_BP_ALL | GO:0071712~ER-associated misfolded protein catabolic process                                       | 3   | 0.418410042 | 0.078447387 | 0.904586897 |
| GOTERM_BP_ALL | GO:0060394~negative regulation of pathway-restricted SMAD protein phosphorylation                  | 3   | 0.418410042 | 0.078447387 | 0.904586897 |
| GOTERM_BP_ALL | GO:0032269~negative regulation of cellular protein metabolic process                               | 49  | 6.834030683 | 0.079078756 | 0.909326189 |
| GOTERM_BP_ALL | GO:0006351~transcription, DNA-templated                                                            | 158 | 22.0362622  | 0.079165229 | 0.909326189 |
| GOTERM_BP_ALL | GO:0008219~cell death                                                                              | 90  | 12.55230126 | 0.0793949   | 0.910200339 |
| GOTERM_BP_ALL | GO:0030182~neuron differentiation                                                                  | 59  | 8.228730823 | 0.079654891 | 0.911418029 |
| GOTERM_BP_ALL | GO:0016071~mRNA metabolic process                                                                  | 35  | 4.881450488 | 0.079912893 | 0.912084971 |
| GOTERM_BP_ALL | GO:0048589~developmental growth                                                                    | 31  | 4.323570432 | 0.080142562 | 0.912084971 |
| GOTERM_BP_ALL | GO:0014044~Schwann cell development                                                                | 4   | 0.557880056 | 0.080482612 | 0.912084971 |
| GOTERM_BP_ALL | GO:0061037~negative regulation of cartilage development                                            | 4   | 0.557880056 | 0.080482612 | 0.912084971 |
| GOTERM_BP_ALL | GO:0071604~transforming growth factor beta production                                              | 4   | 0.557880056 | 0.080482612 | 0.912084971 |
| GOTERM_BP_ALL | GO:0044093~positive regulation of molecular function                                               | 85  | 11.85495119 | 0.080676953 | 0.912542556 |
| GOTERM_BP_ALL | GO:0030163~protein catabolic process                                                               | 41  | 5.718270572 | 0.081074996 | 0.915298102 |

|               |                                                                                             |     |             |             |             |
|---------------|---------------------------------------------------------------------------------------------|-----|-------------|-------------|-------------|
| GOTERM_BP_ALL | GO:0048645~organ formation                                                                  | 6   | 0.836820084 | 0.081608572 | 0.919570352 |
| GOTERM_BP_ALL | GO:0010883~regulation of lipid storage                                                      | 5   | 0.69735007  | 0.081789238 | 0.919857329 |
| GOTERM_BP_ALL | GO:0008203~cholesterol metabolic process                                                    | 9   | 1.255230126 | 0.083387027 | 0.934251    |
| GOTERM_BP_ALL | GO:0050807~regulation of synapse organization                                               | 9   | 1.255230126 | 0.083387027 | 0.934251    |
| GOTERM_BP_ALL | GO:0003279~cardiac septum development                                                       | 8   | 1.115760112 | 0.083694582 | 0.934251    |
| GOTERM_BP_ALL | GO:0001649~osteoblast differentiation                                                       | 13  | 1.813110181 | 0.083798484 | 0.934251    |
| GOTERM_BP_ALL | GO:0048812~neuron projection morphogenesis                                                  | 29  | 4.044630404 | 0.083857184 | 0.934251    |
| GOTERM_BP_ALL | GO:0050803~regulation of synapse structure or activity                                      | 15  | 2.092050209 | 0.084335371 | 0.936059449 |
| GOTERM_BP_ALL | GO:0090130~tissue migration                                                                 | 15  | 2.092050209 | 0.084335371 | 0.936059449 |
| GOTERM_BP_ALL | GO:0050730~regulation of peptidyl-tyrosine phosphorylation                                  | 14  | 1.952580195 | 0.084701959 | 0.93806623  |
| GOTERM_BP_ALL | GO:1901700~response to oxygen-containing compound                                           | 69  | 9.623430962 | 0.084832715 | 0.93806623  |
| GOTERM_BP_ALL | GO:0070271~protein complex biogenesis                                                       | 68  | 9.483960948 | 0.085938544 | 0.948524671 |
| GOTERM_BP_ALL | GO:0014033~neural crest cell differentiation                                                | 7   | 0.976290098 | 0.086114483 | 0.948699893 |
| GOTERM_BP_ALL | GO:0048585~negative regulation of response to stimulus                                      | 65  | 9.065550907 | 0.086376592 | 0.949175082 |
| GOTERM_BP_ALL | GO:0043408~regulation of MAPK cascade                                                       | 35  | 4.881450488 | 0.086477905 | 0.949175082 |
| GOTERM_BP_ALL | GO:0006461~protein complex assembly                                                         | 68  | 9.483960948 | 0.086921745 | 0.950210497 |
| GOTERM_BP_ALL | GO:0006885~regulation of pH                                                                 | 8   | 1.115760112 | 0.087322691 | 0.950210497 |
| GOTERM_BP_ALL | GO:1901215~negative regulation of neuron death                                              | 12  | 1.673640167 | 0.087433156 | 0.950210497 |
| GOTERM_BP_ALL | GO:0050821~protein stabilization                                                            | 10  | 1.394700139 | 0.087931811 | 0.950210497 |
| GOTERM_BP_ALL | GO:0051603~proteolysis involved in cellular protein catabolic process                       | 34  | 4.741980474 | 0.087977365 | 0.950210497 |
| GOTERM_BP_ALL | GO:0035412~regulation of catenin import into nucleus                                        | 4   | 0.557880056 | 0.088015111 | 0.950210497 |
| GOTERM_BP_ALL | GO:0030970~retrograde protein transport, ER to cytosol                                      | 4   | 0.557880056 | 0.088015111 | 0.950210497 |
| GOTERM_BP_ALL | GO:1903513~endoplasmic reticulum to cytosol transport                                       | 4   | 0.557880056 | 0.088015111 | 0.950210497 |
| GOTERM_BP_ALL | GO:0033028~myeloid cell apoptotic process                                                   | 4   | 0.557880056 | 0.088015111 | 0.950210497 |
| GOTERM_BP_ALL | GO:0032990~cell part morphogenesis                                                          | 41  | 5.718270572 | 0.088998893 | 0.958184973 |
| GOTERM_BP_ALL | GO:0061024~membrane organization                                                            | 50  | 6.973500697 | 0.089786516 | 0.958184973 |
| GOTERM_BP_ALL | GO:0048878~chemical homeostasis                                                             | 51  | 7.112970711 | 0.08998893  | 0.958184973 |
| GOTERM_BP_ALL | GO:0044802~single-organism membrane organization                                            | 43  | 5.9972106   | 0.090260564 | 0.958184973 |
| GOTERM_BP_ALL | GO:0002821~positive regulation of adaptive immune response                                  | 7   | 0.976290098 | 0.090273377 | 0.958184973 |
| GOTERM_BP_ALL | GO:0033197~response to vitamin E                                                            | 3   | 0.418410042 | 0.090370407 | 0.958184973 |
| GOTERM_BP_ALL | GO:0055098~response to low-density lipoprotein particle                                     | 3   | 0.418410042 | 0.090370407 | 0.958184973 |
| GOTERM_BP_ALL | GO:0072015~glomerular visceral epithelial cell development                                  | 3   | 0.418410042 | 0.090370407 | 0.958184973 |
| GOTERM_BP_ALL | GO:0006878~cellular copper ion homeostasis                                                  | 3   | 0.418410042 | 0.090370407 | 0.958184973 |
| GOTERM_BP_ALL | GO:1900025~negative regulation of substrate adhesion-dependent cell spreading               | 3   | 0.418410042 | 0.090370407 | 0.958184973 |
| GOTERM_BP_ALL | GO:0031346~positive regulation of cell projection organization                              | 18  | 2.510460251 | 0.091116499 | 0.959478976 |
| GOTERM_BP_ALL | GO:0060968~regulation of gene silencing                                                     | 6   | 0.836820084 | 0.09113998  | 0.959478976 |
| GOTERM_BP_ALL | GO:0016441~posttranscriptional gene silencing                                               | 6   | 0.836820084 | 0.09113998  | 0.959478976 |
| GOTERM_BP_ALL | GO:0035194~posttranscriptional gene silencing by RNA                                        | 6   | 0.836820084 | 0.09113998  | 0.959478976 |
| GOTERM_BP_ALL | GO:0012501~programmed cell death                                                            | 85  | 11.85495119 | 0.091672297 | 0.963371814 |
| GOTERM_BP_ALL | GO:0072001~renal system development                                                         | 17  | 2.370990237 | 0.09201812  | 0.96529451  |
| GOTERM_BP_ALL | GO:0046907~intracellular transport                                                          | 74  | 10.32078103 | 0.092702512 | 0.97052929  |
| GOTERM_BP_ALL | GO:0043393~regulation of protein binding                                                    | 12  | 1.673640167 | 0.092844628 | 0.97052929  |
| GOTERM_BP_ALL | GO:0008333~endosome to lysosome transport                                                   | 5   | 0.69735007  | 0.093433803 | 0.974968577 |
| GOTERM_BP_ALL | GO:0072006~nephron development                                                              | 10  | 1.394700139 | 0.094190908 | 0.981141498 |
| GOTERM_BP_ALL | GO:0032092~positive regulation of protein binding                                           | 7   | 0.976290098 | 0.094539539 | 0.981323728 |
| GOTERM_BP_ALL | GO:0048644~muscle organ morphogenesis                                                       | 7   | 0.976290098 | 0.094539539 | 0.981323728 |
| GOTERM_BP_ALL | GO:0033674~positive regulation of kinase activity                                           | 27  | 3.765690377 | 0.095067444 | 0.98373444  |
| GOTERM_BP_ALL | GO:0034612~response to tumor necrosis factor                                                | 16  | 2.231520223 | 0.095241471 | 0.98373444  |
| GOTERM_BP_ALL | GO:0048708~astrocyte differentiation                                                        | 6   | 0.836820084 | 0.096111653 | 0.98373444  |
| GOTERM_BP_ALL | GO:0043281~regulation of cysteine-type endopeptidase activity involved in apoptotic process | 13  | 1.813110181 | 0.096547728 | 0.98373444  |
| GOTERM_BP_ALL | GO:0031669~cellular response to nutrient levels                                             | 11  | 1.534170153 | 0.096868844 | 0.98373444  |
| GOTERM_BP_ALL | GO:1901576~organic substance biosynthetic process                                           | 262 | 36.54114365 | 0.098011329 | 0.98373444  |
| GOTERM_BP_ALL | GO:0010629~negative regulation of gene expression                                           | 69  | 9.623430962 | 0.098717642 | 0.98373444  |
