# Supplementary material for: Role of Royal Jelly Treated Adipose‐Derived Stem Cell‐Extracellular Vesicles on Fibroblast Proliferation, Migration, and Collagen Production
Source: Hindawi journal article supplement (doi:10.1155/2023/7950026), 2023-01-01
Supplement: f1 [file 7950026.f1.zip]

Supplementary Table 2. Gene Ontology (GO) enrichment analysis based on 3 functional groups (biological processes (BP), cellular components (CC), and molecular functions (MF) in EVs isolated from RJ-treated ADSCs.

Molecular functions (MF): Downregulated

| Category      |             | Term            | Count | %  | P-Value     | FDR |
|---------------|-------------|-----------------|-------|----|-------------|-----|
| GOTERM_MF_ALL | GO:0005515~ | protein binding | 15    | 75 | 0.038022687 | 1   |
