# Supplementary material for: Role of Royal Jelly Treated Adipose‐Derived Stem Cell‐Extracellular Vesicles on Fibroblast Proliferation, Migration, and Collagen Production
Source: Hindawi journal article supplement (doi:10.1155/2023/7950026), 2023-01-01
Supplement: f1 [file 7950026.f1.zip]

Archive with 9 entries (9 files):
- Supplementary Figure (1).docx
- Supplementary_Table_1.pdf
- Supplementary_Table_2-1_.pdf
- Supplementary_Table_2-2_.pdf
- Supplementary_Table_2-3_.pdf
- Supplementary_Table_2-4_.pdf
- Supplementary_Table_2-5_.pdf
- Supplementary_Table_2-6_.pdf
- Supplementary_Table_3_.pdf
