# Supplementary material for: Role of Royal Jelly Treated Adipose‐Derived Stem Cell‐Extracellular Vesicles on Fibroblast Proliferation, Migration, and Collagen Production
Source: Hindawi journal article supplement (doi:10.1155/2023/7950026), 2023-01-01
Supplement: f1 [file 7950026.f1.zip]

**Supplementary Table 1. List of top 20 differentially expressed genes between ADSCs EVs and royal jelly-treated ADSCs EVs .**

| ADSC EVs vs FDRJ-ADSC EVs |       | ADSC EVs vs EzRJ-ADSC EVs |           | ADSC EVs vs FDRJ-ADSC EVs |  | ADSC EVs vs EzRJ-ADSC EVs |  |
|---------------------------|-------|---------------------------|-----------|---------------------------|--|---------------------------|--|
| Upregulated               |       |                           |           | Downregulated             |  |                           |  |
| SFI1                      | 8.759 | 4.11                      | ZSWIM9    | -4.686                    |  | -4.505                    |  |
| MICALL2                   | 7.831 | 4.931                     | NOTCH2NLA | -4.139                    |  | -3.794                    |  |
| SREBF1                    | 7.486 | 4.111                     | HDGFL3    | -3.645                    |  | -2.256                    |  |
| MEF2C                     | 6.936 | 3.553                     | ZHX3      | -3.537                    |  | -2.011                    |  |
| ELN                       | 6.827 | 6.313                     | COPZ1     | -3.261                    |  | -3.58                     |  |
| GPHN                      | 6.687 | 5.462                     | TCEANC2   | -3.164                    |  | -3.081                    |  |
| PI16                      | 6.596 | 8.564                     | PRSS12    | -3.149                    |  | -2.256                    |  |
| STMN2                     | 6.402 | 3.84                      | CABIN1    | -3.083                    |  | -3.159                    |  |
| CD36                      | 6.362 | 3.684                     | ZNF83     | -2.976                    |  | -2.576                    |  |
| TDRP                      | 6.212 | 3.71                      | UBA6      | -2.78                     |  | -5.268                    |  |
| TMEM63B                   | 6.16  | 2.785                     | ELP2      | -2.624                    |  | -2.109                    |  |
| ULK63                     | 6.143 | 5.38                      | NHS       | -2.377                    |  | -5.061                    |  |
| COMP                      | 6.114 | 7.375                     | SHC3      | -2.265                    |  | -2.479                    |  |
| FBLN2                     | 6.099 | 5.09                      | SPIN1     | -2.215                    |  | -4.069                    |  |
| SLC39A13                  | 6.017 | 4.165                     | RHOQ      | -2.207                    |  | -2.638                    |  |
| TMEM68                    | 5.979 | 2.265                     | ZC3H13    | -2.119                    |  | -2.114                    |  |
| RFX1                      | 5.911 | 4.092                     | GXYLT1    | -2.01                     |  | -6.69                     |  |
| SMAD7                     | 5.878 | 3.374                     | GID8      | -2.077                    |  | -2.508                    |  |
| TRH                       | 5.877 | 8.332                     | EPB41L3   | -2.02                     |  | -2.173                    |  |
| ZBTB25                    | 5.751 | 2.573                     | RFLBN     | -2.003                    |  | -2.518                    |  |
| (Fold change)             |       |                           |           |                           |  |                           |  |
