# Supplementary material for: Role of Royal Jelly Treated Adipose‐Derived Stem Cell‐Extracellular Vesicles on Fibroblast Proliferation, Migration, and Collagen Production
Source: Hindawi journal article supplement (doi:10.1155/2023/7950026), 2023-01-01
Supplement: f1 [file 7950026.f1.zip]

Supplementary Table 3. Kyoto Encyclopedia of Genes and Genome (KEGG) pathway enrichment analysis of genes differentially expressed in EVs isolated from RJ-treated ADSCs.

| Category             |                                                               | Term | Count | %           | P-Value     | FDR         |
|----------------------|---------------------------------------------------------------|------|-------|-------------|-------------|-------------|
| <b>Upregulated</b>   |                                                               |      |       |             |             |             |
| KEGG_PATHWAY         | hsa05165:Human papillomavirus infection                       |      | 29    | 4.044630404 | 6.79E-05    | 0.009950705 |
| KEGG_PATHWAY         | hsa04151:PI3K-Akt signaling pathway                           |      | 26    | 3.626220363 | 0.002348086 | 0.096758685 |
| KEGG_PATHWAY         | hsa04512:ECM-receptor interaction                             |      | 18    | 2.510460251 | 2.92E-08    | 8.55E-06    |
| KEGG_PATHWAY         | hsa05205:Proteoglycans in cancer                              |      | 18    | 2.510460251 | 0.002277353 | 0.096758685 |
| KEGG_PATHWAY         | hsa04510:Focal adhesion                                       |      | 17    | 2.370990237 | 0.004552489 | 0.148208817 |
| KEGG_PATHWAY         | hsa04142:Lysosome                                             |      | 15    | 2.092050209 | 5.24E-04    | 0.038372373 |
| KEGG_PATHWAY         | hsa04974:Protein digestion and absorption                     |      | 14    | 1.952580195 | 1.48E-04    | 0.014430525 |
| KEGG_PATHWAY         | hsa04145:Phagosome                                            |      | 14    | 1.952580195 | 0.005616129 | 0.164552587 |
| KEGG_PATHWAY         | hsa04217:Necroptosis                                          |      | 13    | 1.813110181 | 0.019337689 | 0.43584177  |
| KEGG_PATHWAY         | hsa04141:Protein processing in endoplasmic reticulum          |      | 13    | 1.813110181 | 0.031867885 | 0.514186595 |
| KEGG_PATHWAY         | hsa04933:AGE-RAGE signaling pathway in diabetic complications |      | 12    | 1.673640167 | 0.001518612 | 0.088990667 |
| KEGG_PATHWAY         | hsa04514:Cell adhesion molecules                              |      | 12    | 1.673640167 | 0.028305434 | 0.514186595 |
| KEGG_PATHWAY         | hsa05322:Systemic lupus erythematosus                         |      | 11    | 1.534170153 | 0.03641866  | 0.533533364 |
| KEGG_PATHWAY         | hsa05412:Arrhythmogenic right ventricular cardiomyopathy      |      | 10    | 1.394700139 | 0.002641875 | 0.096758685 |
| KEGG_PATHWAY         | hsa05410:Hypertrophic cardiomyopathy                          |      | 10    | 1.394700139 | 0.007494116 | 0.199615992 |
| KEGG_PATHWAY         | hsa05146:Amoebiasis                                           |      | 10    | 1.394700139 | 0.016320221 | 0.398485387 |
| KEGG_PATHWAY         | hsa05222:Small cell lung cancer                               |      | 9     | 1.255230126 | 0.024775065 | 0.514186595 |
| KEGG_PATHWAY         | hsa05414:Dilated cardiomyopathy                               |      | 9     | 1.255230126 | 0.030983358 | 0.514186595 |
| KEGG_PATHWAY         | hsa04931:Insulin resistance                                   |      | 9     | 1.255230126 | 0.055762515 | 0.742655313 |
| KEGG_PATHWAY         | hsa04350:TGF-beta signaling pathway                           |      | 8     | 1.115760112 | 0.069357055 | 0.846734046 |
| KEGG_PATHWAY         | hsa03250:Viral life cycle - HIV-1                             |      | 7     | 0.976290098 | 0.033329389 | 0.514186595 |
| KEGG_PATHWAY         | hsa04115:p53 signaling pathway                                |      | 7     | 0.976290098 | 0.061037839 | 0.777568992 |
| KEGG_PATHWAY         | hsa00514:Other types of O-glycan biosynthesis                 |      | 6     | 0.836820084 | 0.033343158 | 0.514186595 |
| KEGG_PATHWAY         | hsa05144:Malaria                                              |      | 6     | 0.836820084 | 0.042004494 | 0.586062702 |
| KEGG_PATHWAY         | hsa04330:Notch signaling pathway                              |      | 6     | 0.836820084 | 0.075451976 | 0.884297153 |
| <b>Downregulated</b> |                                                               |      |       |             |             |             |
| KEGG_PATHWAY         | hsa04910:Insulin signaling pathway                            |      | 2     | 10          | 0.065637341 | 1           |
