# Supplementary material for: Role of Royal Jelly Treated Adipose‐Derived Stem Cell‐Extracellular Vesicles on Fibroblast Proliferation, Migration, and Collagen Production
Source: Hindawi journal article supplement (doi:10.1155/2023/7950026), 2023-01-01
Supplement: f1 [file 7950026.f1.zip]

**Supplementary Table 2. Gene Ontology (GO) enrichment analysis based on 3 functional groups (biological processes (BP), cellular components (CC), and molecular functions (MF) in EVs isolated from RJ-treated ADSCs.**

**Cellular components (CC): Downregulated**

| Category      | Term                                         | Count | %   | <i>P</i> -Value | FDR         |
|---------------|----------------------------------------------|-------|-----|-----------------|-------------|
| GOTERM_CC_ALL | GO:0044424~intracellular part                | 20    | 100 | 0.005495242     | 0.600750894 |
| GOTERM_CC_ALL | GO:0005622~intracellular                     | 20    | 100 | 0.008900013     | 0.600750894 |
| GOTERM_CC_ALL | GO:0030660~Golgi-associated vesicle membrane | 2     | 10  | 0.052869684     | 1           |
| GOTERM_CC_ALL | GO:0005798~Golgi-associated vesicle          | 2     | 10  | 0.084076798     | 1           |
