# Supplementary material for: Role of Royal Jelly Treated Adipose‐Derived Stem Cell‐Extracellular Vesicles on Fibroblast Proliferation, Migration, and Collagen Production
Source: Hindawi journal article supplement (doi:10.1155/2023/7950026), 2023-01-01
Supplement: f1 [file 7950026.f1.zip › Supplementary Figure (1).docx]

**Supplementary information**

**The role of royal jelly-treated adipose-derived stem cells (ADSCs) extracellular vesicles (EVs) on fibroblast proliferation, migration, and collagen production.**

Tomohiro ITOH1,　Tomomi Degawa2,3, Yuko Ito4, Yukihiro Akao5,Nobuaki Okumura2,3

1 Laboratory for Molecular Chemistry of Aquatic Materials, Department of Life Sciences, Graduate School of Bioresources, Mie University, 1577 Kurimamachiya, Tsu, Mie 514-8507, Japan

2 Instutute for Bee Products and Health Science, Yamada Bee Company Inc., Tomatagun, Okayama 708-0393, Japan

3 Group Cosmetic Central Laboratory, Yamada Bee Company Inc., Shinagawa, Tokyo 104-0004, Japan

4Department of General and Gastroenterological Surgery,Osaka Medical Pharmaceutical College, 2-7 Daigaku-machi, Takatsuki,

Osaka 569-8686, Japan

5United Graduate School of Drug Discovery and Medical Information Sciences, Gifu University, 1-1 Yanagido, Gifu 501-1193,Japan

**Correspondence should be addressed to*: Tomohiro ITOH

1577 Kurimamachiya, Tsu, Mie 514-8507, Japan

Tel: 81-59-231-9675; Fax: 81-59-4231-9675

E-mail: [titoh@bio.mie-u.ac.jp](mailto:titoh@bio.mie-u.ac.jp)

Supplementary data figure and Raw data figures


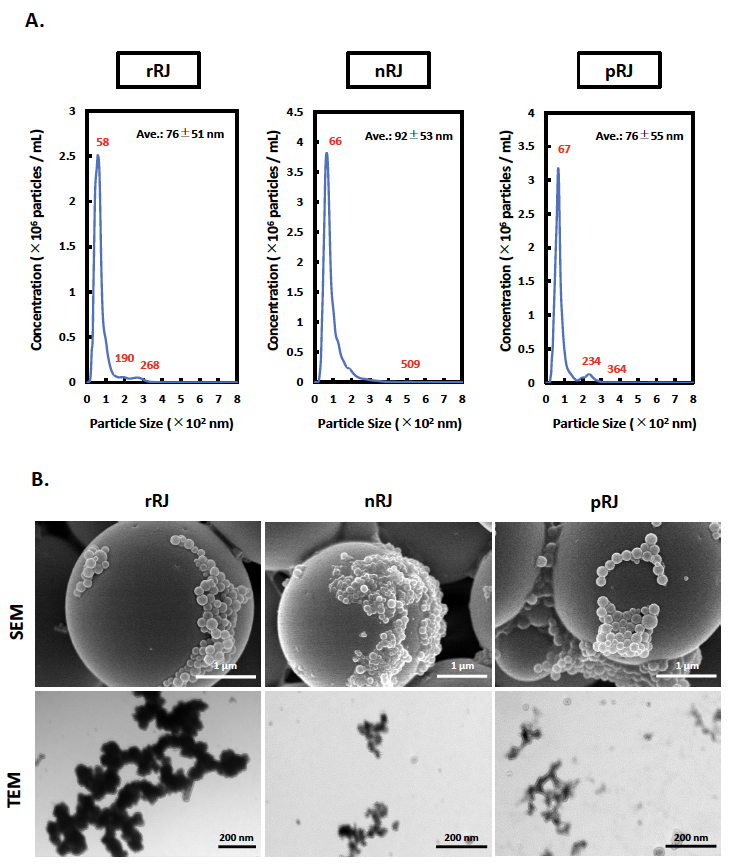


Supplementary Figure 1. (A) The particle distribution of FRJ EVs, nRJ EVs and pRJ EVs measured by NTA. (B) Representative SEM and TEM micrographs of prepared each RJ EVs. Scale bar =1 μm (SEM, upper panel), 200 nm (TEM, Lower panel).


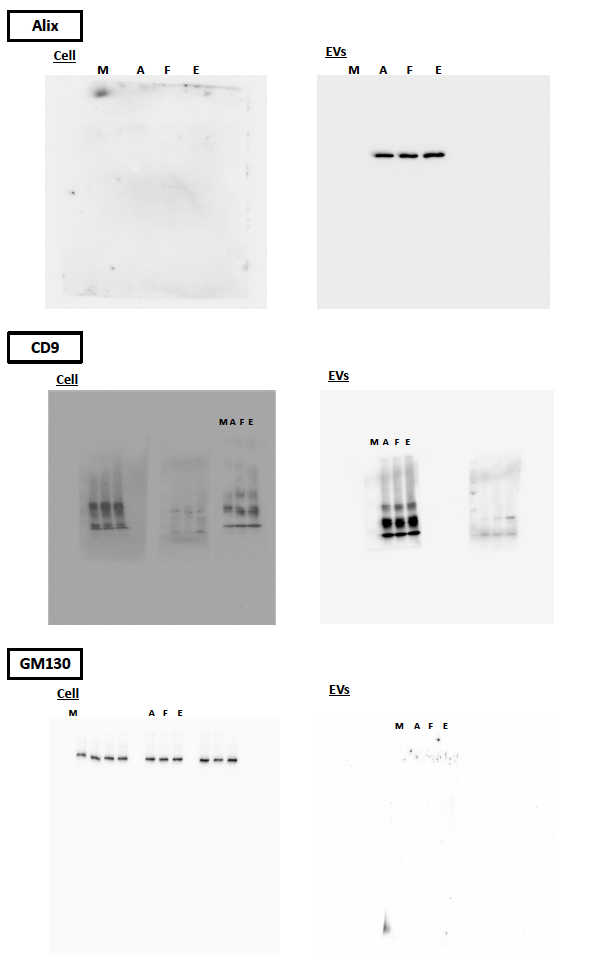


Supplementary Figure 2.　Original western blot images.

Original scan of the western blot displayed in Figure 2F.


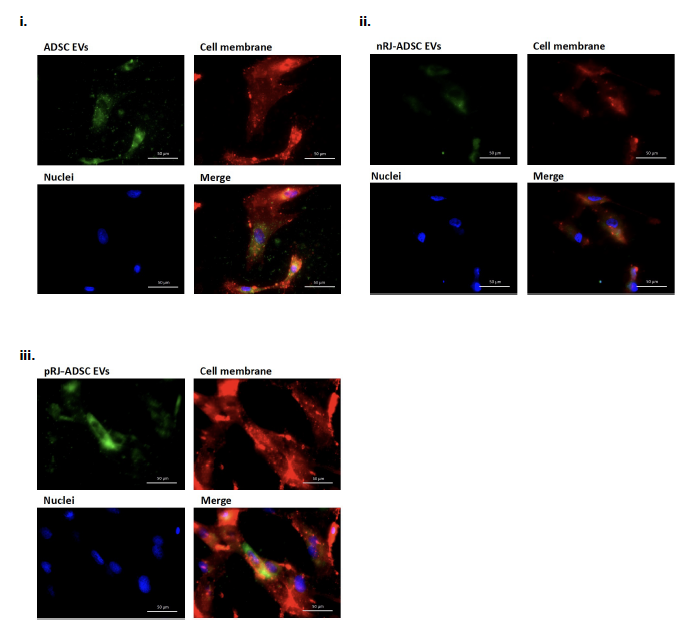


Supplementary Figure 3.　Fluorescence microscopic observation images of the subcellular localization of incorporated-ADSC EVs in NHDFs. Nucei (blue): Hoechst33342, cell membrane (red): CellROX™ Deep Red, EVs (green): PKH67. i: ADSC EVs, ii: nRJ-ADSC EVs, iii: pRJ-ADSC EVs, Scale bar = 50 μm.
