# Supplementary material for: Role of Royal Jelly Treated Adipose‐Derived Stem Cell‐Extracellular Vesicles on Fibroblast Proliferation, Migration, and Collagen Production
Source: Hindawi journal article supplement (doi:10.1155/2023/7950026), 2023-01-01
Supplement: f1 [file 7950026.f1.zip › Supplementary_Table_2-2_.pdf]

**Supplementary Table 2. Gene Ontology (GO) enrichment analysis based on 3 functional groups (biological processes (BP), cellular components (CC), and molecular functions (MF) in EVs isolated from RJ-treated ADSCs.**

**Biological processes (BP): Downregulated**

| Category      | Term                                                | Count | %  | P-Value     | FDR |
|---------------|-----------------------------------------------------|-------|----|-------------|-----|
| GOTERM_BP_ALL | GO:0030866~cortical actin cytoskeleton organization | 2     | 10 | 0.03192214  | 1   |
| GOTERM_BP_ALL | GO:0030865~cortical cytoskeleton organization       | 2     | 10 | 0.036822476 | 1   |
| GOTERM_BP_ALL | GO:0048856~anatomical structure development         | 10    | 50 | 0.066165656 | 1   |
| GOTERM_BP_ALL | GO:0044767~single-organism developmental process    | 10    | 50 | 0.066307125 | 1   |
| GOTERM_BP_ALL | GO:0032502~developmental process                    | 10    | 50 | 0.078090185 | 1   |
| GOTERM_BP_ALL | GO:0048869~cellular developmental process           | 8     | 40 | 0.085513407 | 1   |
| GOTERM_BP_ALL | GO:0007275~multicellular organism development       | 9     | 45 | 0.088934566 | 1   |
